# Supplementary material for: Stress-activated MAPK signaling controls fission yeast actomyosin ring integrity by modulating formin For3 levels
Source: eLife. 2020 Sep 11;9:e57951. doi: 10.7554/eLife.57951 (PMC7511234; doi:10.7554/eLife.57951)
Supplement: Figure 1—source data 1. [file elife-57951-fig1-data1.xlsx]

## Sheet: Figure 1C
				Figure 1C
								Relative Sty1 activation units *
					1h LatA (μM):	0	0.1	0.2	0.5	1	2	5	10
				Experiment 1		0.96	0.97	1.97	1.91	2.3	2.64	5.62	5.67
				Experiment 2		1	1.1	1.7	2.2	2.4	3.6	5	6
				Experiment 3		0.97	1.07	1.33	1.41	1.53	2.11	3.68	3.68
				Mean		0.9767	1.047	1.667	1.84	2.077	2.783	4.767	5.117
				Std. Deviation		0.02082	0.06807	0.3213	0.3996	0.4761	0.7553	0.9908	1.255
				* Relative Units for Sty1 activation were estimated by determining the signal ratio of the anti-phospho-p38 blots with respect to the anti-HA blot (total Sty1)

## Sheet: Figure 1G
									Figure 1G
													Dispersal of CRIB-3xGFP from cell poles (%) *
										LatA (μM):	0	0	0.2	0.2	0.5	0.5	1	1	5	5
										Time (min):	30	60	30	60	30	60	30	60	30	60
									Experiment 1		0	0	0	1.36986	0	84.507	18.2692	77.2277	97.8495	99.1111
									Experiment 2		0	0	0	0.921659	1.37615	82.5	31.3901	94.6364	96.1539	99.0741
									Mean		0	0	0	1.146	0.6881	83.5	24.83	85.93	97	99.09
									Std. Deviation		0	0	0	0.3169	0.9731	1.419	9.278	12.31	1.199	0.02619
									* number of scored cells per sample >100
