# Supplementary material for: Stress-activated MAPK signaling controls fission yeast actomyosin ring integrity by modulating formin For3 levels
Source: eLife. 2020 Sep 11;9:e57951. doi: 10.7554/eLife.57951 (PMC7511234; doi:10.7554/eLife.57951)
Supplement: Figure 2—source data 1. [file elife-57951-fig2-data1.xlsx]

## Sheet: Figure 2B
		Figure 2B
													Number of actin patches at the medial region of interphasic G2 cells (n=25) expressing the F-actin marker LifeAct-GFP
																															Mean	Std. Deviation
		Wild type (untreated)			6	0	3	4	7	3	7	3	4	4	1	1	1	3	5	1	1	4	2	2	1	0	4	7	6		3.2	2.217
		Wild type (0.15 μM LatA, 30 min)			1	2	1	5	12	11	5	2	9	10	11	4	10	6	10	4	7	11	3	10	5	11	19	7	6		7.28	4.287
		sty1∆ (untreated)			1	2	4	1	2	3	2	5	9	3	0	2	3	3	3	6	4	4	5	5	6	2	4	7	2		3.52	2.064
		sty1∆ (0.15 μM LatA, 30 min)			2	1	6	2	6	3	4	11	0	3	4	2	1	4	4	4	4	11	3	9	4	2	4	7	3		4.16	2.838
		wis1DD (untreated)			2	1	0	0	1	1	1	4	1	1	1	1	3	2	2	2	2	1	3	1	1	6	3	0	1		1.64	1.35
		wis1DD (0.15 μM LatA, 30 min)			8	17	13	14	4	12	4	3	6	4	6	3	20	4	6	9	4	2	5	3	7	4	14	18	4		7.76	5.333

## Sheet: Figure 2C
								Figure 2C
													Cells with actin cables (%) *
											Experiment 1		Experiment 2		Experiment 3		Mean	Std. Deviation
								Wild type (untreated)			100		100		100		100	0
								Wild type (0.15 μM LatA, 30 min)			39.0625		34.5029		35.03		36.2	2.494
								sty1∆ (untreated)			100		100		100		100	0
								sty1∆ (0.15 μM LatA, 30 min)			72.2772		71.0526		67.045		70.12	2.737
								wis1DD (untreated)			100		100		100		100	0
								wis1DD (0.15 μM LatA, 30 min)			9.00901		24.375		28.6		20.66	10.31
								* number of cells per sample > 100

## Sheet: Figure 2D
		Figure 2D
							% Cells with defective CAR*
					Experiment 1		Experiment 2		Experiment 3		Mean	Std. Deviation
		Wild type (0.2 μM LatA)			61,53 (8/13)		69,23 (9/13)		60,00 (6/10)		63.59	4.947
		sty1∆ (0.2 μM LatA)			10,0 (1/10)		15,38 (2/13)		16,70 (2/12)		14.03	3.549
		* Total number of cells > 35

## Sheet: Figure 2E
		Figure 2E
							% Cells with defective CAR*
					Experiment 1		Experiment 2		Experiment 3		Mean	Std. Deviation
		Wild type (0.15 μM LatA)			10 (1/10)		10 (1/10)		21,43 (3/14)		13.81	6.599
		wis1DD (0.15 μM LatA)			66,7 (8/12)		86,7 (13/15)		91,7 (11/12)		81.7	13.23
		* Total number of cells > 34

## Sheet: Figure 2F
					Figure 2F
										% Cells with defective CAR*
								Experiment 1		Experiment 2		Experiment 3		Mean	Std. Deviation
					Wild type 0.15 μM LatA, 0 min)			0.48		0.4		0.3		0.3933	0.09018
					Wild type (0.15 μM LatA, 20 min)			43		40.8		36		39.93	3.58
					Wild type (0.15 μM LatA, 40 min)			97.3		94.35		91.76		94.47	2.772
					Wild type (0.15 μM LatA, 60 min)			98.89		99.3		97.56		98.58	0.9096
					Wild type (0.15 μM LatA, 80 min)			99.28		95.13		96.49		96.97	2.116
					sty1∆ (0.15 μM LatA, 0 min)			0.24		0		0.36		0.2	0.1833
					sty1∆ (0.15 μM LatA, 20 min)			17.45		15.24		16.58		16.42	1.113
					sty1∆ (0.15 μM LatA, 40 min)			52.22		47.64		48.34		49.4	2.467
					sty1∆ (0.15 μM LatA, 60 min)			66.19		55.39		52.69		58.09	7.144
					sty1∆ (0.15 μM LatA, 80 min)			78.34		68.54		63.29		70.06	7.639
					wis1DD (0.15 μM LatA, 0 min)			5.29		1.26		0.93		2.493	2.428
					wis1DD (0.15 μM LatA, 20 min)			58.45		62.04		53.19		57.89	4.451
					wis1DD (0.15 μM LatA, 40 min)			99.83		97.21		100		99.01	1.564
					wis1DD (0.15 μM LatA, 60 min)			99.32		100		100		99.77	0.3926
					wis1DD (0.15 μM LatA, 80 min)			100		100		100		100	0
					* number of cells per sample > 200

## Sheet: Figure 2G
					Figure 2G
												% Cells with defective CAR*
									Experiment 1		Experiment 2		Experiment 3		Mean	Std. Deviation
					Sty1-T97A (0.15 μM LatA, 0 min)				0		0		0		0	0
					Sty1-T97A (0.15 μM LatA, 20 min)				34.7826		26.7857		28.2407		29.94	4.26
					Sty1-T97A (0.15 μM LatA, 40 min)				66.0377		71.0059		59.7015		65.58	5.666
					Sty1-T97A (0.15 μM LatA, 60 min)				82.4859		84.7458		67.9426		78.39	9.119
					Sty1-T97A (0.15 μM LatA, 80 min)				85.7798		89.4737		82.2115		85.82	3.631
					Sty1-T97A (0.15 μM LatA, 100 min)				87.7729		90.6103		83.7963		87.39	3.423
					Sty1-T97A + 3BrPP1 (0.15 μM LatA, 0 min)				0		0		0		0	0
					Sty1-T97A + 3BrPP1 (0.15 μM LatA, 20 min)				24.2718		27.0968		17.1429		22.84	5.13
					Sty1-T97A + 3BrPP1 (0.15 μM LatA, 40 min)				48.5577		45.9016		34.8259		43.1	7.283
					Sty1-T97A + 3BrPP1 (0.15 μM LatA, 60 min)				52.0202		61.5942		48.0952		53.9	6.944
					Sty1-T97A + 3BrPP1 (0.15 μM LatA, 80 min)				67.1642		64.1509		70.4142		67.24	3.132
					Sty1-T97A + 3BrPP1 (0.15 μM LatA, 100 min)				72.807		80		75.6881		76.17	3.62
					* number of cells per sample > 200
