# Supplementary material for: Stress-activated MAPK signaling controls fission yeast actomyosin ring integrity by modulating formin For3 levels
Source: eLife. 2020 Sep 11;9:e57951. doi: 10.7554/eLife.57951 (PMC7511234; doi:10.7554/eLife.57951)
Supplement: Figure 3—source data 1. [file elife-57951-fig3-data1.xlsx]

## Sheet: Figure 3B
		Figure 3B
							% Cells with defective CAR*
					Experiment 1		Experiment 2		Experiment 3		Mean	Std. Deviation
		Wild type (0.15 μM LatA)			13,33 (2/15)		27,78 (5/18)		22,22 (4/22)		21.11	7.289
		for3∆ (0.15 μM LatA)			70,0 (14/20)		62,5 (20/32)		76,0 (19/25)		69.5	6.764
		* Total number of cells > 55

## Sheet: Figure 3C
					Figure 3C
												% Cells with defective CAR*
									Experiment 1		Experiment 2		Experiment 3		Mean	Std. Deviation
					Wild type (0.15 μM LatA, 40 min)				94.25		98.04		95.25		95.85	1.964
					sty1∆ (0.15 μM LatA, 40 min)				53.34		65.86		57.65		58.95	6.36
					for3∆ (0.15 μM LatA, 40 min)				90.51		91.06		88.74		90.1	1.212
					sty1∆ for3∆ (0.15 μM LatA, 40 min)				88.14		91.75		88.64		89.51	1.956
					* number of cells per sample > 200
