# Supplementary material for: Stress-activated MAPK signaling controls fission yeast actomyosin ring integrity by modulating formin For3 levels
Source: eLife. 2020 Sep 11;9:e57951. doi: 10.7554/eLife.57951 (PMC7511234; doi:10.7554/eLife.57951)
Supplement: Figure 4—source data 1. [file elife-57951-fig4-data1.xlsx]

## Sheet: Figure 4B
		Figure 4B
							% Cells with defective CAR*
					Experiment 1		Experiment 2		Experiment 3		Mean	Std. Deviation
		For3-3GFP (0.2 μM LatA)			75,0 (9/12)		73,33 (11/15)		80,0 (8/10)		76.11	3.471
		For3(DAD)-2GFP (0.2 μM LatA)			10,0 (1/10)		10,0 (1/10)		15,38 (2/13)		11.79	3.106
		* Total number of cells > 33

## Sheet: Figure 4C
			Figure 4C
									% Cells with defective CAR*
							Experiment 1		Experiment 2		Experiment 3		Mean	Std. Deviation
			wis1 DD For3-3GFP (0.15 μM LatA)				86,66 (13/15)		78,57 (11/14)		80,0 (8/10)		81.74	4.318
			wis1 DD For3(DAD)-2GFP (0.15 μM LatA)				47,61 (10/21)		58,33 (7/12)		40,90 (9/22)		48.95	8.792
			* Total number of cells > 39
