# Supplementary material for: Stress-activated MAPK signaling controls fission yeast actomyosin ring integrity by modulating formin For3 levels
Source: eLife. 2020 Sep 11;9:e57951. doi: 10.7554/eLife.57951 (PMC7511234; doi:10.7554/eLife.57951)
Supplement: Figure 5—source data 1. [file elife-57951-fig5-data1.xlsx]

## Sheet: Figure 5B
						Figure 5B
										Relative For3 level *
							Experiment 1		Experiment 2		Experiment 3		Mean	Std. Deviation
						Wild type	1		0.95		0.83		0.9267	0.08737
						sty1∆	1.35		1.83		1.82		1.667	0.2743
						pyp1∆	0.27		0.57		0.17		0.3367	0.2082
						wis1DD	0.61		0.46		0.69		0.5867	0.1168
						* Estimated by determining the signal ratio of the correspondent anti-GFP (total For3) blot with respect to the anti-cdc2 blot (internal control)

## Sheet: Figure 5C
					Figure 5C
											Relative For3 level *
									Experiment 1		Experiment 2		Mean	Std. Deviation
					Sty1-T97A ( 0 h )				1		1.1		1.05	0.07071
					Sty1-T97A (1 h))				0.832		1		0.916	0.1187
					Sty1-T97A (2 h)				1.002		0.94		0.9713	0.04433
					Sty1-T97A (3 h)				1.281		1.14		1.211	0.09984
					Sty1-T97A (4 h)				1.174		1.13		1.152	0.03136
					Sty1-T97A + 3BrPP1 (0 h)				1.356		1.065		1.211	0.2063
					Sty1-T97A + 3BrPP1 (1 h)				1.346		1.11		1.228	0.1675
					Sty1-T97A + 3BrPP1 (2 h)				2.144		2.06		2.102	0.05987
					Sty1-T97A + 3BrPP1 (3 h)				3.031		2.53		2.781	0.3547
					Sty1-T97A + 3BrPP1 (4 h)				2.234		2.045		2.14	0.1341
					* Estimated by determining the signal ratio of the correspondent anti-GFP (total For3) blot with respect to the anti-cdc2 blot (internal control)
							* Estimated by determining the signal ratio of the correspondent anti-GFP (total For3) blot with respect to the anti-cdc2 blot (internal control)

## Sheet: Figure 5D (part one)
Figure 5D
														Fluorescence intensity data (obtained from line scans) of For3-3GFP at the CAR
			Wild type											Number of cells > 28
Cell width (μm)		1	2	3	4	5	6	7	8	9	10	11	12	13	14	15	16	17	18	19	20	21	22	23	24	25	26	27	28	29	30	Average
0		134.05	152.129	225.603	153.111	253.491	142.207	117.337	157.394	122.36	176.941	133.447	128.832	122.343	128.196	138.691	112.182	155.36	133.119	151.97	128.32	118.149	134.076	117.873	167.403	157.4	133.893	167.841	127.595	143.958	109.364	134.05
0.0663		170.117	174.488	301.124	194.134	286.387	159.342	135.193	207.72	137.31	239.079	165.916	153.572	142.343	157.977	176.986	127.784	206.576	151.98	185.67	129.503	122.322	133.469	126.153	239.348	188.3	151.166	219.108	152.335	171.31	126.604	174.444
0.1326		210.526	211.714	324.949	238.675	300.538	176.673	173.983	269.229	165.935	273.7	225.418	191.725	181.398	204.061	241.456	153.22	257.288	180.438	243.893	139.509	139.004	150.402	135.722	340.656	239.5	216.655	295.774	179.188	202.144	154.286	213.922
0.1989		287.396	260.355	289.687	288.111	290.345	197.592	256.555	315.124	210.859	258.939	291.978	230.29	228.686	257.109	306.856	174.496	288.553	218.335	337.392	166.366	164.724	183.572	138.737	412.063	321.6	306.854	377.091	203.31	243.653	190.935	256.585
0.2652		385.049	303.435	238.511	325.911	260.747	215.312	343.854	319.967	268.727	221.359	331.456	276.433	282.741	342.227	338.528	203.333	291.33	265.268	377.048	220.061	193.216	211.511	174.282	420.778	389.4	376.503	451.81	245.437	270.571	262.914	293.591
0.3315		414.036	346.483	194.56	326.169	220.343	213.99	396.564	282.606	326.321	176.899	311.823	302.3	325.198	423.368	325.641	244.841	268.412	304.209	313.335	298.764	212.14	231.205	213.13	369.371	439.4	370.441	489.315	309.223	249.416	364.123	308.788
0.3978		374.406	375.683	170.304	297.089	187.006	197.267	366.359	238.608	356.606	153.125	248.086	269.962	334.529	468.279	276.224	267.261	221.749	330.61	243.134	352.524	225.428	263.844	239.323	290.463	444.2	284.071	428.225	372.139	216.536	415.253	296.943
0.4641		305.866	350.994	159.044	235.741	169.871	185.827	268.056	216.259	345.259	153.78	191.121	212.199	317.896	443.55	229.825	239.095	175.802	338.948	202.285	343.475	270.532	262.587	268.677	216.102	440.2	200.5	323.834	351.672	197.457	390.268	266.891
0.5304		230.573	302.705	147.188	193.894	161.949	177.339	195.281	207.582	301.608	160.923	163.505	169.541	263.321	356.447	186.343	190.532	147.929	306.234	175.203	288.253	330.822	227.027	289.544	183.484	423.3	157.948	282.345	285.124	188.229	323.212	233.913
0.5967		183.308	257.634	139.876	172.033	156.339	167.192	162.278	199.38	255.884	160.647	148.897	157.79	207.053	270.949	152.774	155.776	137.343	261.826	175.506	235.717	360.725	195.65	319.849	181.4	363.5	149.52	284.34	223.924	189.048	250.292	209.215
0.663		163.849	224.36	132.939	165.51	157.467	159.028	148.33	191.253	223.222	156.962	148.307	156.753	175.719	220.524	137.203	140.992	135.243	236.242	184.07	211.323	338.107	182.801	311.414	168.31	321.5	152.04	274.706	190.392	189.55	203.723	193.395
0.7293		152.282	201.512	121.521	167.521	157.865	149.922	147.002	187.26	205.815	151.324	151.042	148.451	166.905	200.037	132.72	138.918	131.514	226.318	176.329	207.389	293.715	171.768	292.858	152.475	295.2	162.002	250.531	176.788	189.349	181.287	182.921
0.7956		152.084	193.406	118.145	166.837	154.394	144.754	152.53	185.065	202.231	146.278	157.568	150.537	167.331	185.036	129.588	137.248	125.944	229.255	169.024	202.478	271.525	172.548	286.318	157.78	275.2	161.737	237.031	163.676	189.042	161.255	178.195
0.8619		158.222	180.995	124.108	170.574	145.691	146.527	163.229	188.868	196.779	142.149	161.978	163.57	165.595	178.056	128.586	135.061	125.54	232.703	174.161	181.333	280.512	170.883	259.68	167.503	255.5	163.312	234.11	160.452	180.757	156.136	176.419
0.9282		173.848	170.151	130.16	174.533	137.14	148.742	163.235	186.594	200.418	140.277	155.894	160.952	165.365	176.329	128.475	137.248	123.244	225.551	168.346	184.423	278.73	171.544	236.68	159.782	243.7	164.783	235.73	155.504	175.836	159.18	174.413
0.9945		169.747	161.953	131.551	178.672	132.557	139.351	153.518	185.03	199.982	136.182	156.323	154.95	168.126	182.101	126.173	134.642	121.295	200.783	170.366	182.776	262.358	171.383	207.645	163.087	234.2	173.45	236.175	152.69	174.958	176.128	171.272
1.0608		158.375	161.855	130.86	167.199	133.794	130.239	153.803	186.831	197.161	126.787	158.985	146.669	171.536	182.582	125.88	130.614	122.59	174.579	163.459	180.858	239.371	166.797	186.469	173.772	233.9	172.06	221.667	151.119	182.153	171.644	166.787
1.1271		161.926	155.289	128.309	155.406	135.822	126.799	155.993	184.484	198.941	121.441	159.042	141.584	165.945	181.308	126.711	127.439	121.293	155.778	157.259	178.439	213.099	161.668	178.369	185.255	218.3	162.588	212.853	149.93	182.142	158.822	162.075
1.1934		168.152	151.084	129.351	153.771	136.68	128.792	162.303	182.009	196.218	123.76	160.051	145.383	154.155	189.096	128.433	122.316	121.958	151.67	166.227	174.801	199.515	152.867	169.237	190.766	207.4	173.928	216.395	151.395	170.58	161.291	161.32
1.2597		181.357	153.917	130.494	163.568	136.709	128.709	168.28	182.737	187.147	129.566	162.799	149.413	148.659	197.73	132.469	119.352	120.454	153.001	160.973	170.969	196.761	146.913	162.725	196.047	195.4	180	214.279	151.748	164.023	161.744	161.598
1.326		194.492	155.535	126.369	165.656	141.471	126.361	163.805	178.348	177.31	134.648	165.552	149.621	156.817	200.469	134.701	121.065	120.363	149.421	150.549	166.141	202.642	146.536	152.545	197.132	187.2	168.671	212.2	151.315	153.405	164.831	160.506
1.3923		199.966	153.566	122.671	162.242	146.292	125.228	168.35	172.148	169.326	134.922	165.014	147.554	166.708	210.474	137.345	125.795	124.007	149.66	151.573	167.033	198.868	141.327	146.485	184.659	185	164.849	192.338	146.322	147.487	167.848	159.169
1.4586		207.908	154.639	123.831	159.612	141.575	126.794	168.191	166.811	161.83	131.031	167.94	146.513	165.432	210.293	138.972	128.923	124.704	152.601	154.1	167.207	191.086	139.869	146.017	176.855	185.4	165.689	187.596	147.008	151.511	172.878	158.761
1.5249		212.056	153.078	122.717	158.85	136.585	125.261	164.476	164.854	159.35	128.898	171.722	146.52	162.58	206.727	140.122	132.238	127.147	151.876	146.729	169.678	185.518	145.554	142.675	178.94	190.5	169.406	182.704	149.428	153.437	167.661	158.243
1.5912		199.828	149.025	122.185	157.095	137.908	125.761	171.914	157.803	160.652	132.508	176.855	149.066	160.092	207.644	137.703	132.405	130.782	150.561	149.678	169.107	178.573	146.833	144.031	173.605	190.1	178.204	180.593	147.396	155.264	162.03	157.84
1.6575		187.067	147.862	121.153	153.725	140.817	122.499	162.937	152.328	157.074	141.706	171.632	140.06	160.325	202.987	135.876	125.962	132.929	151.414	142.897	166.96	180.473	140.665	153.799	165.513	191.1	176.19	174.005	147.274	157.847	161.013	155.536
1.7238		186.016	147.998	116.053	159.295	140.946	121.6	149.913	154.855	153.173	142.268	167.724	131.985	153.945	199.934	138.736	125.538	132.542	155.647	135.977	162.441	176.684	131.997	155.592	166.758	191.6	161.338	171.79	148.541	154.944	167.29	153.437
1.7901		174.809	145.747	112.705	159.712	140.09	124.504	145.557	159.495	155.665	134.002	177.248	132.661	156.629	196.245	139.256	129	129.694	160.286	137.424	165.524	163.922	124.256	164.078	171.465	188.7	159.007	174.544	147.723	149.175	161.87	152.7
1.8564		169.955	140.77	110.723	154.354	142.02	124.226	150.297	162.467	156.154	128.189	180.18	139.366	162.214	195.675	136.337	131.754	125.488	159.107	135.786	170.571	157.974	125.345	165.065	168.561	187.2	158.381	170.985	150.949	147.654	169.1	152.562
1.9227		166.072	135.935	113.35	160.422	152.229	126.615	155.418	160.254	155.086	130.089	174.602	150.999	159.108	191.759	136.524	136.894	123.336	153.489	137.443	172.852	161.68	123.364	152.87	157.263	181.9	158.194	168.509	154.814	145.6	160.053	151.891
1.989		157.049	133.737	115.276	163.146	160.375	127.404	157.871	156.257	158.063	131.988	161.474	145.244	161.158	185.66	141.763	137.349	124.723	154.902	138.577	177.021	171.529	129.953	155.452	151.116	189.4	167.322	166.52	149.115	147.158	154.672	152.376
2.0553		149.227	129.448	112.945	156.914	160.579	126.908	152.165	151.615	160.418	129.513	154.431	138.571	162.574	183.441	144.529	133.182	126.592	153.603	137.577	179.417	171.425	138.982	161.959	156.142	185.6	171.282	164.787	142.666	144.833	152.816	151.138
2.1216		143.532	131.213	112.523	159.715	159.764	130.988	142.815	152.196	157.93	126.249	151.959	141.376	152.932	184.748	141.461	126.105	125.539	146.467	140.906	181.895	162.163	135.438	158.401	157.585	187.4	174.582	162.085	141.287	146.974	150.6	149.561
2.1879		137.769	137.272	109.374	164.367	151.689	137.761	136.922	155.802	153.228	125.289	144.043	141.057	153.249	182.024	139.485	125.72	124.332	142.613	146.509	175.544	167.879	133.159	160.13	152.565	176.1	168.256	170.611	139.695	148.158	148.202	148.293
2.2542		133.139	139.671	109.563	161.327	143.505	137.798	147.777	154.964	155.527	126.656	143.124	140.064	158.709	185.351	141.865	129.587	123.61	144.137	143.313	179.75	179.541	130.273	160.514	150.549	179.5	168.312	176.873	136.448	153.779	144.251	149.316
2.3205		131.14	138.57	109.743	155.579	138.324	130.842	152.357	152.828	159.221	128.428	144.842	148.542	156.87	182.039	144.587	133.437	122.459	149.957	135.797	170.884	184.38	130.483	163.652	158.357	172.3	183.712	175.004	133	160.497	139.455	149.576
2.3868		137.02	136.353	111.528	154.214	138.846	129.38	142.09	152.86	165.034	128.808	139.623	153.941	155.423	184.663	151.234	137.556	124.36	157.102	132.004	165.531	175.131	134.781	159.328	169.275	170.7	182.534	177.513	137.266	164.926	137.29	150.21
2.4531		147.713	136.222	118.94	158.439	141.858	131.465	133.431	153.958	165.246	128.217	132.35	149.632	156.567	184.626	153.546	136.202	126.425	167.294	131.641	162.382	173.546	138.661	154.576	172.964	167.5	178.349	176.855	139.136	167.205	138.686	150.788
2.5194		146.496	141.443	121.008	159.358	142.927	136.293	137.037	155.326	170.689	126.773	136.977	155.44	160.398	179.678	153.854	128.493	123.377	177.518	140.348	162.794	180.137	134.158	155.251	164.596	165	169.102	176.373	139.54	167.998	147.907	151.876
2.5857		151.057	145.25	120.859	156.714	142.137	138.808	135.388	157.588	174.701	128.881	144.679	157.549	161.649	175.788	153.841	123.611	116.573	174.72	145.956	164.898	180.948	133.901	153.323	161.266	161.6	154.646	177.623	141.368	169.363	151.405	151.87
2.652		155.822	144.199	119.097	157.626	135.326	137.014	137.256	160.293	181.519	132.502	145.008	153.192	157.887	174.856	152.701	128.018	119.983	177.717	148.624	166.34	175.012	135.359	144.053	160.322	162.1	161.108	180.704	143.971	169.697	153.491	152.36
2.7183		143.468	144.852	118.564	158.739	129.016	135.53	141.39	157.474	167.014	131.406	141.904	145.614	158.115	179.797	147.093	133.469	125.073	171.871	158.345	168.392	174.259	131.176	147.941	159.891	159.9	173.87	182.5	145.675	169.773	151.21	151.777
2.7846		132.317	143.966	120.282	161.011	127.692	131.18	131.738	149.936	160.465	127.775	139.37	135.86	159.659	183.786	142.065	128.027	125.22	169.866	146.32	168.673	174.377	128.658	150.629	170.137	165	171.884	184.405	144.266	167.32	137.368	149.308
2.8509		128.123	142.334	123.405	163.262	128.907	125.21	127.528	152.242	167.744	129.488	138.508	132.061	160.684	180.036	140.674	126.258	122.885	162.777	140.898	168.845	170.599	130.157	143.471	170.867	179	172.417	186.052	144.091	164.716	133.994	148.574
2.9172		131.12	142.305	122.757	166.041	127.592	120.049	132.138	154.826	163.364	125.187	140.315	137.577	165.612	177.624	140.48	130.072	121.767	163.815	146.47	164.046	166.734	133.892	151.187	168.406	198.4	170.152	185.575	145.43	161.664	132.575	149.572
2.9835		136.322	146.789	122.239	169.048	123.192	118.764	127.517	157.493	160.008	120.841	140.962	136.799	165.96	178.566	139.808	134.775	123.998	166.927	145.628	162.622	177.266	139.606	149.503	171.744	196.5	162.37	184.411	146.453	162.836	130.179	149.971
3.0498		134.436	151.475	123.402	172.299	123.956	127.678	124.174	162.018	161.744	120.06	143.157	131.036	168.522	180.735	141.482	135.222	125.091	170.574	144.182	168.178	178.996	144.839	148.906	173.88	200.2	164.568	180.717	146.453	163.904	130.038	151.397
3.1161		128.615	155.678	127.413	169.28	127.422	133.854	122.541	161.124	166.485	119.742	143.992	130.941	170.949	182.848	141.487	128.008	126.857	176.146	143.521	169.408	170.597	144.548	155.701	171.905	203	166.674	185.992	149.046	166.894	128.857	152.317
3.1824		128.322	153.227	133.507	158.576	126.358	132.727	123.595	157.406	168.999	117.91	141.132	130.179	176.89	181.281	140.774	125.672	125.622	177.95	142.341	169.196	163.9	154.362	156.772	174.247	207.2	164.689	186.615	152.649	171.209	125.701	152.3
3.2487		131.821	146.96	136.152	161.567	129.269	126.44	130.404	153.22	167.167	118.48	135.624	130.06	167.571	184.113	143.721	128.372	123.204	170.972	144.907	162.442	163.994	155.998	149.727	170.378	205.3	162.16	192.513	155.98	180.216	123.902	151.755
3.315		141.072	144.892	130.324	162.405	136.152	123.99	128.954	148.322	171.858	123.976	133.454	136.784	165.679	185.743	146.01	127.057	129.893	173.054	146.886	177.067	175.162	164.453	152.804	172.746	208.9	158.731	193.389	148.806	178.74	124.44	153.725
3.3813		145.138	140.327	124.862	147.414	149.891	125.025	130.019	150.887	174.65	128.755	130.097	142.592	165.684	186.892	146.466	125.056	136.031	172.445	147.613	176.48	180.005	150.634	164.361	169.047	208.9	158.166	194.803	148.396	185.59	132.863	154.636
3.4476		145.439	136.87	125.409	132.313	168.292	123.851	131.938	151.281	173.75	128.288	131.036	143.563	154.668	188.227	146.33	121.201	138.989	167.414	155.73	178.648	180.724	150.641	176.644	173.802	199.6	168.202	193.564	166.163	186.937	143.025	156.085
3.5139		152.586	142.442	132.436	132.702	192.21	119.218	128.679	144.59	178.762	127.099	134.549	147.725	135.51	195.156	143.934	120.975	142.641	168.65	156.589	178.235	179.926	166.778	169.253	182.759	196.6	173.373	195.458	186.369	183.681	143.546	158.414
3.5802		160.237	152.965	131.726	144.086	230.789	116.112	132.911	143.887	177.782	130.767	131.042	143.629	129.682	205.538	142.038	123.544	142.751	176.583	153.702	178.05	181.75	168.728	168.644	175.571	188.2	163.191	201.098	212.782	185.165	156.035	161.633
3.6465		174.229	165.19	135.869	150.87	273.931	117.439	133.746	152.309	184.124	130.187	123.958	140.995	138.199	213.984	144.462	127.473	150.36	183.862	153.639	180.995	180.558	167.225	180.138	167.885	180.6	175.689	236.056	253.399	211.659	169.88	169.964
3.7128		184.339	188.578	157.441	145.826	285.855	120.438	144.733	161.11	191.3	133.517	125.375	144.913	148.619	229.695	148.981	134.482	166.949	193.535	158.149	187.548	180.97	168.837	183.762	177.184	181.7	189.645	237.638	283.751	262.752	184.53	180.072
3.7791		186.048	226.338	191.228	140.54	280.833	129.111	164.734	168.452	194.799	152.419	128.203	143.137	146.249	232.909	153.554	142.697	195.613	203.243	167.23	199.076	186.369	156.017	184.418	183.487	180.9	186.696	247.388	273.606	297.902	194.781	187.933
3.8454		197.069	274.283	220.335	143.074	260.773	143.35	166.282	180.424	184.853	189.385	128.767	139.76	137.382	241.146	157.419	153.087	223.148	214.763	189.749	208.612	194.946	147.546	198.895	172.524	175.5	191.06	248.999	234.273	300.401	193.76	193.719
3.9117		238.138	311.953	230.385	149.103	218.162	165.372	178.766	193.773	180.091	223.641	131.909	143.543	138.954	253.35	163.138	173.226	247.378	233.741	221.372	221.037	205.6	138.213	222.408	168.17	177.5	204.449	246.472	192.749	260.062	201.401	201.135
3.978		333.667	324.835	215.931	140.975		194.992	203.718	216.217	177.739	243.841	134.519	146.099	148.107	276.776	179.605	210.061	264.532	259.842	259.195	225.773	208.666	133.977	271.189	175.745	184.9	223.078	290.122	164.147	201.661	225.783	215.024
4.0443		460.884	315.009	188.387	126.196		229.81	223.592	248.137	191.458	253.275	137.898	148.567	142.739	303.21	228.203	256.968	272.841	285.003	283.259	216.942	219.524	136.082	340.626	177.723	200	260.074	373.011	140.848	156.925	283.553	234.508
4.1106		569.03	268.838	156.734	122.019		270.056	240.335	269.398	213.502	238.964	141.155	161.3	129.64	333.851	318.719	278.415	265.959	300.721	284.995	217.523	264.348	142.859	357.617	177.359	219.5	320.604	400.778	127.212	133.47	353.771	250.989
4.1769		581.073	203.174	131.577	131.972		293.43	268.923	252.478	235.065	210.182	140.291	173.419	123.447	380.581	395.675	251.696	236.479	302.317	297.487	241.408	326.576	134.492	323.559	207.734	267.5	353.154	333.351				261.425
4.2432		441.63	159.985		134.075		278.504	312.012	204.959	253.696	205.205	141.767	181.242	129.031	446.317	407.402	197.325	192.898	287.761	310.664	292.013	371.561	129.737	260.178	264.094	350	357.853	238				261.916
4.3095		305.1			135.013		222.555		162.705	245.668	234.118	140.869	183.71	135.926	464.794	350.337	152.138	156.508	258.962	286.478	349.862	392.227	132.242	211.65	333.964	436.8	317.857	167.828				251.187
4.3758					138.822				139.775	213.29	268.289	141.257	186.055	140.879	472.076	254.538		131.232	235.159		366.322	356.918	136.057	181.208	389.325	463.4	247.636	127.034				241.541
4.4421					145.759					179.113	282.381	158.399	200.833	145.943	469.801	175.453		115.462	205.88		319.838	301.363	136.478	160.584	376.264	419.5	197.989					234.767
4.5084					153.071					150.908	269.438	179.386	217.926	146.181	420.832	129.611		108.361	184.269		239.636	254.783	143.355	147.631	320.951	339.5	155.677					209.501
			sty1∆
Cell width (μm)		1	2	3	4	5	6	7	8	9	10	11	12	13	14	15	16	17	18	19	20	21	22	23	24	25	26	27	28	Average
0		115.076	126.071	117.201	140.765	158.522	145.683	131.743	124.055	108.761	140.5	109.109	110.621	126.486	228.769	105.831	118.715	110.431	146.12	115.119	92.312	101.338	118.476	110.409	145.439	118.308	129.166	136.414	100.659	134.05
0.0663		108.731	145.103	152.999	200.969	158.308	216.389	156.612	162.307	142.818	189.537	121.486	109.008	134.389	309.451	128.655	133.788	100.423	234.191	130.154	83.361	95.093	138.158	143.723	207.91	165.409	179.213	255.62	120.66	174.444
0.1326		106.485	194.185	231.63	301.422	158.115	373.721	210.537	236.925	226.153	253.238	151.899	121.557	146.986	392.961	175.6	159.31	89.099	377.823	153.279	90.597	103.026	183.587	241.191	291.34	251.451	238.117	516.602	186.939	213.922
0.1989		115.857	284.744	368.806	477.027	171.316	565.045	318.472	316.446	344.9	322.411	215.385	183.759	183.059	449.951	250.779	183.972	86.885	523.587	214.368	127.341	140.977	263.509	401.848	362.958	367.381	306.592	821.417	312.382	256.585
0.2652		132.205	452.497	525.328	640.487	208.91	622.351	461.834	350.635	486.143	369.728	288.492	287.178	243.793	466.242	379.141	215.19	108.501	614.494	302.211	213.745	237.681	354.068	533.117	410.905	482.013	368.69	859.268	482.325	293.591
0.3315		159.506	638.655	633.095	662.014	308.99	523.557	501.665	321.052	516.395	409.798	382.574	379.505	295.053	441.868	511.947	264.113	171.577	627.115	404.127	380.288	417.979	443.509	594.264	389.28	549.069	447.548	630.376	624.577	308.788
0.3978		191.859	737.937	689.349	558.26	444.689	385.662	395.432	247.222	488.949	451.661	458.963	433.716	309.918	359.441	522.633	289.748	299.254	529.364	497.539	613.073	593.461	540.665	519.291	317.635	546.461	546.545	354.448	688.688	296.943
0.4641		232.592	762.698	648.705	450.748	543.693	259.684	262.068	190.026	401.356	496.466	455.47	403.723	299.093	281.476	443.96	304.523	490.189	383.335	504.248	768.93	644.446	571.809	373.787	253.26	460.338	637.147	199.137	642.281	266.891
0.5304		337.787	629.786	583.008	366.728	517.328	190.162	177.977	163.126	293.686	525.438	376.776	349.714	250.431	250.935	332.17	313.311	646.592	279.477	413.117	664.135	514.75	499.885	274.147	215.012	343.615	671.867	150.585	530.454	233.913
0.5967		434.91	412.64	493.797	300.345	385.206	170.38	146.554	140.64	244.204	471.804	269.888	303.131	195.488	252.774	232.001	312.364	650.692	243.585	309.526	416.332	378.924	412.142	236.437	205.494	282.214	655.094	144.479	423.539	209.215
0.663		454.462	269.702	412.634	246.162	268.468	171.275	148.627	134.848	219.487	353.659	203.906	264.786	172.651	248.881	172.904	293.166	466.452	252.028	260	240.08	265.483	323.411	215.17	208.02	254.495	612.206	144.505	348.924	193.395
0.7293		396.564	229.613	339.219	206.02	214.757	175.987	146.395	138.064	220.07	258.882	192.669	230.474	156.984	225.444	152.159	279.613	273.296	285.243	232.562	172.066	201.582	290.477	203.581	207.539	252.232	543.822	141.054	308.857	182.921
0.7956		286.945	233.704	278.374	187.878	208.533	179.301	150.148	144.4	213.163	192.431	183.481	208.259	145.628	211.365	147.525	267.058	174.836	298.336	199.421	175.707	184.263	292.453	182.365	205.275	255.296	493.665	137.441	269.359	178.195
0.8619		229.717	217.603	234.965	178.268	201.963	185.996	159.113	143.318	190.471	166.496	178.701	205.855	141.382	209.15	148.318	241.47	154.873	281.556	183.871	189.392	164.709	282.314	162.215	201.537	247.49	438.865	137.884	251.762	176.419
0.9282		210.656	188.426	196.72	167.743	181.506	186.641	154.46	140.625	186.642	159.489	172.311	207.171	141.337	200.211	153.105	224.606	161.926	259.368	197.499	180.299	155.194	257.611	164.152	197.471	236.957	364.653	142.983	239.512	174.413
0.9945		209.092	175.483	176.229	160.111	167.328	178.466	142.376	141.433	184.858	161.661	161.38	206.855	141.799	188.28	163.573	207.622	164.851	244.246	199.089	165.18	154.787	226.476	170.661	195.615	247.437	318.411	147.943	231.901	171.272
1.0608		198.538	169.415	169.472	153.172	167.078	174.337	140.567	144.994	178.821	163.703	158.1	211.861	139.494	183.581	162.953	195.05	156.012	231.799	205.116	166.016	156.476	208.406	168.979	192.59	253.632	308.971	150.204	229.497	166.787
1.1271		189.986	161.953	164.971	147.79	166.224	174.275	147.351	148.471	178.9	158.554	160.706	203.399	132.424	177.545	165.4	182.718	156.714	220.098	199.127	167.312	156.27	200.048	165.597	186	250.664	301.335	152.309	221.444	162.075
1.1934		178.393	166.31	161.104	148.345	166.978	168.99	142.514	149.066	177.63	155.74	156.809	190.361	125.996	174.238	159.86	178.38	168.577	209.915	191.43	165.043	154.827	190.422	170.386	181.426	248.117	278.802	154.371	226.411	161.32
1.2597		179.213	173.897	159.329	148.753	172.795	170.846	139.005	144.373	172.303	153.445	150.18	193.839	122.885	181.146	149.29	180.699	177.24	210.151	191.051	155.519	156.503	192.415	176.386	188.946	243.067	258.24	156.717	233.732	161.598
1.326		200.931	174.819	161.331	142.137	176.311	177.744	135.792	142.189	162.437	151.478	159.365	198.694	124.386	194.988	150.216	181.623	172.502	201.077	189.98	157.195	165.7	188.675	179.43	194.402	227.039	243.234	156.308	223.955	160.506
1.3923		208.674	174.847	158.123	142.794	175.373	171.902	132.229	143.861	149.052	152.863	155.858	189.52	131.914	188.882	154.42	183.004	162.174	186.5	188.327	166.702	167.513	192.518	181.05	196.251	217.861	230.676	148.161	219.092	159.169
1.4586		200.647	165.745	159.479	146.493	166.871	163.299	141.613	150.225	158.053	152.614	146.332	179.359	134.899	177.791	156.386	192.358	164.972	181.109	188.212	170.042	158.948	199.071	175.329	194.864	214.535	226.072	143.524	223.629	158.761
1.5249		182.184	158.38	155.697	154.352	158.015	158.464	144.533	151.413	176.81	150.202	147.704	169.442	132.09	184.741	155.795	186.571	170.673	177.354	188.12	161.751	154.233	202.762	172.767	203.056	203.612	221.329	144.79	222.571	158.243
1.5912		173.568	165.511	153.79	165.069	153.999	153.793	136.666	145.033	177.461	150.54	139.028	163.664	131.743	190.217	149.206	171.528	171.339	174.716	187.275	148.858	143.699	198.939	164.039	212.723	190.497	215.38	146.121	228.177	157.84
1.6575		173.754	166.798	155.773	168.153	152.178	166.52	128.641	148.209	170.004	163.33	146.897	160.054	132.237	193.692	150.974	175.995	156.5	171.06	187.084	154.652	140.032	195.404	164.549	224.464	187.536	202.347	146.429	234.313	155.536
1.7238		170.784	164.959	156.404	163.476	151.314	180.969	127.497	144.914	161.401	174.556	144.638	164.931	131.67	199.094	155.412	174.674	152.027	177.105	186.989	167.126	139.999	205.126	169.385	229.493	189.401	186.272	143.911	227.939	153.437
1.7901		171.069	168.202	161.913	159.04	156.873	171.251	131.53	140.475	159.789	175.407	136.12	172.571	136.42	188.88	157.794	169.33	160.285	168.666	186.671	175.568	141.975	225.834	166.973	225.927	189.442	179.121	140.566	207.23	152.7
1.8564		175.629	171.796	163.846	157.296	163.194	166.575	134.395	146.726	155.915	174.128	135.531	164.679	136.143	189.012	157.661	165.535	175.08	153.975	173.017	169.764	136.556	225.053	167.975	224.542	195.378	177.436	141.026	195.958	152.562
1.9227		172.604	176.791	161.664	156.108	161.137	172.187	137.822	155.256	151.213	177.046	146.152	149.423	133.993	189.969	156.242	176.06	173.296	156.157	166.799	177.216	139.879	216.432	172.827	230.777	209.568	180.021	140.994	188.542	151.891
1.989		177.722	177.813	164.153	157.667	159.983	175.687	130.592	151.979	154.939	173.518	157.63	142.815	131.685	189.015	157.534	193.153	170.336	157.581	166.009	200.659	148.897	208.802	172.052	228.738	211.626	177.254	139.458	180.197	152.376
2.0553		177.221	182.338	169.886	166.563	165.641	184.944	124.682	151.644	157.768	170.348	154.377	151.519	136.253	180.205	157.999	193.491	192.872	158.055	172.834	204.289	145.418	203.582	166.36	229.399	206.564	173.325	139.747	172.54	151.138
2.1216		167.961	185.793	173.822	167.57	170.838	189.276	123.153	159.564	160.818	173.835	154.795	155.347	145.499	171.391	154.911	195.958	206.498	155.729	180.972	202.075	157.135	196.411	173.946	226.461	209.183	169.754	139.343	177.017	149.561
2.1879		172.832	179.183	176.276	158.133	177.398	178.972	131.033	151.311	161.017	176.677	162.578	153.186	142.173	170.788	161.897	208.693	196.012	159.185	177.277	201.02	163.938	185.539	178.818	226.709	212.532	167.98	144.193	185.931	148.293
2.2542		179.131	157.296	178.343	161.174	176.815	173.531	139.16	139.511	159.301	189.033	167.199	149.142	132.542	178.968	158.024	212.246	200.908	166.359	189.938	186.755	141.646	178.675	173.79	227.885	212.141	163.768	150.177	182.261	149.316
2.3205		168.224	155.377	181.602	156.431	176.731	172.505	143.542	151.2	161.607	195.003	162.341	150.942	126.586	178.547	150.066	199.436	196.397	163.587	185.317	181.542	132.69	184.263	158.868	227.51	215.452	164.025	146.058	177.636	149.576
2.3868		167.783	164.471	184.933	146.928	184.83	172.469	136.709	155.988	158.763	206.042	161.217	161.851	126.463	162.37	141.873	186.005	184.232	161.193	168.164	173.007	127.445	191.365	149.853	226.262	227.633	168.909	144.285	181.634	150.21
2.4531		170.686	175.069	186.71	141.422	185.155	177.155	134.041	159.257	149.347	210.413	159.918	164.478	126.836	154.21	141.101	181.002	174.982	163.799	167.344	155.585	121.893	206.495	155.752	214.687	227.309	168.171	145.456	174.223	150.788
2.5194		171.857	180.037	186.763	132.49	183.036	184.702	142.348	166.475	149.149	206.03	158.301	159.107	122.979	163.569	142.46	169.467	163.198	166.674	172.299	163.556	134.435	219.157	171.66	210.074	216.208	165.731	143.445	173.099	151.876
2.5857		172.139	179.303	181.098	134.457	187.935	195.191	139.785	171.152	154.969	194.523	164.709	156.686	127.712	168.114	146.648	165.968	162.642	167.508	171.708	161.707	140.608	214.645	170.469	217.324	204.948	164.535	133.593	171.102	151.87
2.652		170.364	187.357	179.351	151.396	192.18	198.892	134.239	177.326	152.439	180.812	166.982	161.681	131.678	161.396	146.732	171.403	163.136	182.002	172.72	160.249	142.876	216.03	169.922	215.486	205.17	164.123	129.548	177.495	152.36
2.7183		171.744	194.11	182.433	162.833	195.772	185.041	134.825	182.532	154.907	177.314	169.299	160.466	132.264	154.726	151.864	172.957	157.943	189.445	173.387	180.004	141.506	220.882	178.314	219.16	211.874	163.248	132.283	177.015	151.777
2.7846		178.675	198.379	184.768	156.009	200.574	178.319	131.16	180.741	164.964	180.972	166.902	162.607	141.88	153.436	153.049	177.092	163.106	194.744	159.567	206.955	138.332	223.572	183.363	214.731	208.367	163.482	136.768	175.579	149.308
2.8509		165.984	207.807	191.808	155.905	196.012	182.049	132.803	181.322	175.46	189.166	165.536	160.593	151.802	152.954	151.477	173.286	188.235	209.542	159.427	205.129	138.348	208.099	183.338	211.182	199.137	164.463	143.782	179.651	148.574
2.9172		155.337	217.912	195.144	164.038	191.976	195.064	146.326	190.967	171.452	196.551	166.543	162.441	155.397	164.318	154.47	167.083	235.124	212.695	154.403	206.677	134.585	187.532	189.313	207.039	192.759	168.526	145.608	173.752	149.572
2.9835		154.285	206.118	189.769	173.478	193.584	197.472	140.863	206.56	154.733	198.181	160.383	154.923	163.614	159.783	160.069	161.025	241.078	226.731	162.981	199.428	139.519	182.947	201.472	205.307	188.338	172.605	147.262	177.303	149.971
3.0498		164.943	197.31	186.131	180.285	195.846	189.13	129.269	229.152	151.897	194.56	155.927	153.32	168.6	163.157	164.334	162.952	249.664	225.82	167.965	190.458	137.471	187.669	203.727	198.858	194.939	172.846	156.98	169.995	151.397
3.1161		173.676	199.764	184.575	190.032	191.596	182.321	132.489	222.157	165.793	196.87	164.295	159.404	173.094	173.092	162.761	170.845	226.96	219.088	170.171	193.31	133.626	184.092	196.214	203.332	215.362	174.802	162.174	176.583	152.317
3.1824		177.329	198.491	177.899	209.298	186.891	194.084	141.487	204.702	173.57	218.991	163.366	167.533	204.806	190.126	157.744	164.923	204.366	222.744	170.815	174.747	128.341	185.1	200.165	199.747	236.251	178.747	161.834	172.428	152.3
3.2487		180.099	197.052	174.759	213.619	193.567	198.281	147.18	198.777	167.136	233.624	155.966	179.444	273.108	215.609	171.233	160.194	182.026	222.347	156.886	164.261	133.844	189.718	204.902	191.624	253.789	182.091	166.866	162.275	151.755
3.315		181.251	202.946	167.78	209.249	199.976	193.629	159.066	201.004	155.287	232.9	158.816	180.018	309.418	236.728	186.217	153.515	164.502	210.64	157.288	166.016	146.8	183.248	195.2	187.518	283.394	185.645	175.485	161.964	153.725
3.3813		170.698	227.23	161.709	201.203	205.288	189.919	157.507	208.321	146.599	250.365	162.093	176.288	298.616	236.523	182.64	155.337	162.504	194.3	162.59	168.402	139.711	180.677	202.959	184.223	308.306	180.517	198.6	162.768	154.636
3.4476		161.046	236.228	160.507	199.145	210.395	190.086	155.955	219.865	145.273	290.577	169.883	177.871	253.319	198.781	175.053	167.441	171.431	190.811	168.464	180.949	138.035	181.421	203.039	184.992	348.126	174.595	249.078	176.364	156.085
3.5139		161.952	238.114	149.243	191.595	213.467	186.759	158.974	226.146	177.166	349.358	165.327	178.388	222.46	187.024	168.761	187.061	179.933	187.939	172.574	192.402	145.923	171.328	183.001	188.165	413.983	173.838	341.532	192.219	158.414
3.5802		158.154	230.727	146.536	184.035	214.535	196.069	168.208	245.13	243.812	418.787	165.989	184.928	198.941	213.028	171.412	206.619	194.136	195.492	185.051	205.367	166.461	160.75	179.169	190.692	465.768	174.198	466.642	211.994	161.633
3.6465		161.66	214.408	166.133	196.017	222.726	194.729	176.639	305.273	335.78	487.738	201.038	208.503	166.877	230.454	193.038	228.337	207.279	208.73	224.749	251.247	192.134	166.609	183.496	199.419	477.593	175.211	601.918	242.923	169.964
3.7128		183.316	216.789	205.816	246.459	256.491	186.881	166.835	424.155	432.263	500.944	269.226	253.272	153.849	245.976	271.781	260.692	240.412	216.169	304.684	316.099	230.521	187.262	184.417	203.916	451.443	180.645	668.47	273.311	180.072
3.7791		212.377	250.827	288.115	365.127	303.395	187.665	162.162	552.522	441.555	450.393	347.909	317.678		294.766	365.861	302.828	287.225	235.193	401.383	365.932	284.369	211.294	180.024	207.215	427.762	188.428	532.646	301.259	187.933
3.8454		264.873	312.57	387.151	544.947	373.513	218.652	166.813	540.433	350.123	373.445	413.309	355.445		367.933	400.186	335.782	345.997	261.747	470.673	379.712	402.478	244.439	182.346	215.268	393.033	201.123	348.806	340.139	193.719
3.9117		318.141	408.155	429.87	688.892	458.109	260.626	181.142	422.759	233.524	274.811	439.004	327.312		411.475	355.097	334.465	388.151	276.139	441.955	424.064	626.698	290.482	189.12	227.765	306.981	216.973	217.889	398.778	201.135
3.978		404.649	644.671	412.19	671.035	474.363	316.678	239.615	283.451	141.71	180.812	371.022	267.935		342.44	256.202	321.651	432.412	330.035	307.841	568.617	830.117	343.986	193.808	240.93	228.742	258.02	153.57	483.577	215.024
4.0443		551.017	920.5	337.675	511.637	408.493	394.126	359.946	185.714	101.598	125.098	261.247	206.198		236.967	182.55	294.372	513.099	468.987	206.748	746.093	785.842	378.897	202.918	254.648	184.19	347.249	123.051	590.932	234.508
4.1106		697.861	829.069	234.255	314.528	305.976	474.565	479.705	142.771			184.039	154.26		160.339	131.721	242.74	648.485	665.158	150.103	716.989	549.471	454.039	241.071	272.384	166.816	464.673	104.098	619.977	250.989
4.1769		731.217	598.358	156.701	201.836	208.967	495.171	503.91				139.822			127.639	99.508	191.079	695.702	911.012	120.555	522.603	328.899	554.129	310.742	302.093		528.383		521.217	261.425
4.2432		645.64	285.416	120.349	144.529	145.637	418.598	397.175				113.81			117.579		159.725	581.771	760.047		313.565	194.854	575.33	421.572	348.893		557.957		358.224	261.916
4.3095		472.558	145.342	108.542	117.803		303.33	259.178				107.05			114.685		136.561	401.391	531.113		179.41	127.184	481.289	523.606	413.695		564.316		220.967	251.187
4.3758		326.157	98.648	114.726	110.15		206.517	166.712							110.736		125.348	237.337	733.371		123.56		322.86	509.786	489.664		478.405		141.861	241.541
4.4421		246.166	80.365				148.758	126.749							106.489		117.314		377.315				214.045	367.249	563.413		324.126		110.117	234.767
4.5084		178.24					117.682	114.509									108.461		176.344				155.892	233.853	571.462		189.92		108.156	209.501

## Sheet: Figure 5D (part two)
Figure 5D
														Fluorescence intensity data (obtained from line scans) of Pmk1-GFP at the CAR
			Wild type											Number of cells > 28
Cell width (μm)		1	2	3	4	5	6	7	8	9	10	11	12	13	14	15	16	17	18	19	20	21	22	23	24	25	26	27	28	Average
0		128.966	126.833	229.912	137.548	142.427	130.852	133.653	127.278	131.219	153.821	128.483	141.309	129.6	162.158	156.095	192.244	131.266	115.548	129.355	117.924	143.708	147.511	143.601	151.841	198.127	166.958	131.627	127.399	145.025
0.0663		130.132	121.639	258.816	148.91	167.791	150.45	135.298	127.269	137.725	173.269	140.209	144.693	135.9	174.563	180.661	235.674	137.856	101.814	118.146	124.282	151.457	158.115	166.425	175.506	229.101	190.034	139.535	143.891	157.702
0.1326		135.137	125.261	280.452	172.69	194.061	181.049	136.509	139.823	157.81	194.434	160.115	160.434	150.2	195.222	208.593	276.904	152.847	106.104	118.949	145.967	156.273	180.617	195.136	199.439	259.286	219.706	164.943	161.992	177.107
0.1989		152.249	132.372	310.662	205.798	223.466	211.668	151.607	161.34	188.286	217.538	190.355	183.839	174.1	216.032	239.03	315	180.493	132.844	134.056	180.553	171.511	201.759	224.916	227.611	289.53	243.229	196.527	183.1	202.96
0.2652		185.054	136.702	321.741	231.083	257.484	237.859	190.863	188.898	220.039	241.561	223.892	220.061	196.1	231.142	282.527	342.3	208.715	176.407	165.013	219.696	201.669	222.413	251.643	253.813	332.415	275.24	219.688	196.932	231.437
0.3315		227.113	150.336	317.511	243.429	290.71	256.259	251.747	218.804	253.354	268.155	255.572	264.284	212.9	244.029	331.059	363.333	241.386	235.067	203.12	262.808	229.081	245.433	265.177	285.185	338.069	306.925	240.042	223.169	259.416
0.3978		270.241	166.779	322.361	259.566	305.947	265.543	311.863	245.179	277.84	285.91	288.47	299.546	232	266.192	351.81	378.656	268.364	305.574	245.629	293.911	251.968	262.238	273.234	317.626	331.752	314.986	269.13	241.465	283.008
0.4641		317.56	189.55	329.069	277.56	314.309	272	368.198	259.21	319.083	293.39	322.189	322.5	247.9	290.058	345.504	373.102	304.312	351.437	281.647	321.563	278.001	278.005	290.553	315.262	335.034	309.591	283.766	252.991	301.388
0.5304		378.391	225.501	334.497	283.672	321.979	264.075	391.018	264.973	342.798	287.201	332.337	324.21	265.4	309.204	345.314	353.791	336.42	363.961	308.913	332.408	299.635	286.875	293.724	319.71	338.76	303.749	291.81	265.145	312.155
0.5967		412.742	246.515	324.611	282.964	311.176	248.759	365.229	283.461	335.787	270.649	314.422	307.914	278.6	306.116	335.415	338.993	330.743	361.184	330.782	317.758	321.919	277.928	285.942	324.879	333.692	308.492	295.238	281.447	310.921
0.663		377.194	258.565	314.715	285.963	292.692	241.522	340.453	292.626	330.601	267.298	288.32	298.192	290.3	283.493	325.141	327.963	330.462	357.524	323.695	298.29	337.652	265.901	289.657	329.003	321.383	302.123	295.926	285.285	304.692
0.7293		374.176	267.472	309.827	289.865	288.574	250.017	332.298	282.806	327.582	267.436	275.457	300.385	289	278.769	312.909	319.138	334.834	345.943	302.001	290.699	352.403	260.455	297.705	321.867	309.962	296.398	291.979	268.37	300.68
0.7956		374.578	258.391	301.084	294.835	282.767	268.967	336.364	280.89	326.394	265.613	266.554	297.566	277.3	280.594	296.947	304.372	337.543	334.096	290.752	278.763	354.09	256.588	300.924	314.373	299.073	295.526	289.203	250.221	296.042
0.8619		359.026	239.488	308.49	295.938	271.3	279.165	338.18	287.866	315.084	257.173	261.074	283.289	264.7	280.132	283.343	292.405	328.4	328.205	283.965	258.528	344.418	255.999	294.987	305.216	289.359	281.438	296.376	247.553	289.159
0.9282		363.25	231.827	318.53	296.993	259.185	276.808	322.72	294.283	304.349	247.009	260.547	264.74	263.3	280.697	272.466	290.355	317.36	318.296	264.833	247.844	337.653	253.74	291.175	295.816	274.726	282.816	287.254	247.068	283.175
0.9945		330.027	229.325	303.13	293.524	250.127	276.518	303.982	295.704	294.82	241.721	262.079	246.553	254.1	271.193	262.793	286.342	306.375	306.367	249.598	241.92	334.009	250.146	280.379	285.242	270.569	279.488	264.48	259.816	274.944
1.0608		309.324	218.178	285.73	280.939	240.913	273.097	295.323	293.839	281.971	236.02	267.936	236.881	247.8	275.061	247.387	285.803	296.766	289.73	244.515	231.648	314.878	244.68	261.228	273.572	270.612	274.001	247.244	270.867	266.8
1.1271		305.101	211.046	290.108	272.547	234.905	269.989	299.921	281.393	267.667	235	266.946	241.989	243.1	277.547	244.773	282.13	285.783	274.773	235.327	225.02	297.376	239.343	251.972	272.565	269.411	274.364	235.219	260.394	261.315
1.1934		287.862	209.276	293.728	275.618	243.685	266.997	304.81	262.647	263.565	233.713	262.252	242.422	248.6	268.264	259.46	273.988	273.558	260.89	226.932	217.82	289.726	236.907	252.071	273.464	262.414	266.404	235.236	257.816	257.868
1.2597		291.964	207.738	299.502	281.149	255.015	258.182	293.305	252.47	262.064	237.524	264.072	234.471	253.4	257.905	266.058	274.315	272.55	250.982	220.617	214.692	279.564	235.662	256.921	271.669	258.614	251.946	228.494	260.919	255.899
1.326		305.534	212.817	302.334	268.675	254.32	248.572	279.964	253.836	260.877	234.348	266.939	228.086	254.1	256.842	256.713	277.01	273.358	250.791	214.959	217.765	258.254	238.268	258.3	263.231	255.253	243.415	229.938	266.112	253.944
1.3923		304.688	208.894	289.778	259.015	248.796	243.337	274.342	257.795	259.222	227.916	265.184	230.681	250.4	258.803	245.515	275.293	269.286	249.145	216.623	228.376	244.615	235.201	244.386	258.235	249.145	246.697	242.022	258.837	250.874
1.4586		282.318	205.938	273.888	250.386	242.794	240.994	275.8	259.895	256.642	226.698	256.268	241.645	244.3	248.044	233.905	286.536	261.786	239.631	223.866	249.642	241.307	231.574	236.491	250.105	253.148	238.58	265.308	234.67	247.521
1.5249		305.398	211.19	266.825	240.475	232.724	238.302	279.06	251.462	257.284	226.106	251.78	241.166	255	237.732	222.44	290.18	258.159	231.665	243.007	258.455	239.847	228.04	235.941	246.118	268.921	242.788	267.6	223.284	247.515
1.5912		321.619	207.321	276.606	237.986	220.628	242.338	273.297	242.871	254.393	230.436	254.627	231.774	256.8	240.659	210.894	277.314	250.724	235.7	258.494	255.269	245.343	226.533	235.175	256.974	269.51	259.071	252.098	228.98	247.534
1.6575		309.161	204.707	274.559	242.531	211.857	245.604	267.127	241.243	253.267	240.21	258.125	230.486	257	249.659	206.664	266.167	246.996	244.577	257.873	250.524	252.021	237.043	237.255	269.31	257.817	276.355	246.093	230.09	247.978
1.7238		292.677	205.67	258.672	241.606	209.382	254.061	263.031	239.137	266.145	244.626	259.851	225.437	253.2	255.222	209.784	266.172	258.327	251.011	252.869	254.509	250.636	245.314	237.943	264.801	256.201	277.55	253.077	220.562	248.145
1.7901		315.868	202.39	255.036	231.886	207.187	259.175	255.276	239.653	272.896	237.239	265.328	224.05	240.1	255.635	208.392	268.443	271.176	244.764	253.239	256.078	256.039	241.688	237.402	253.159	262.456	265.679	261.288	220.528	247.867
1.8564		327.805	208.791	275.94	224.943	206.824	249.6	253.394	238.302	264.253	233.182	267.234	227.827	250.7	254.738	210.396	270.932	264.639	243.808	257.412	252.966	255.819	232.746	243.036	256.813	273.009	269.144	255.828	232.266	249.672
1.9227		325.704	214.335	297.557	230.029	214.22	243.727	257.583	238.294	258.764	237.889	262.434	223.413	255.4	247.7	214.847	270.597	253.486	252.306	254.935	247.923	250.479	233.301	248.544	266.767	278.382	279.275	244.277	228.091	250.822
1.989		309.623	213.56	306.187	236.9	221.893	241.55	261.362	242.449	263.175	239.494	254.35	229.191	255.7	238.922	221.9	263.984	257.089	251.515	250.717	235.342	243.287	240.127	250.815	274.16	277.669	286.818	244.253	225.35	250.721
2.0553		288.462	205.899	313.476	234.197	227.475	234.75	261.51	245.767	271.583	240.671	249.008	229.785	252	241.585	229.35	265.027	266.519	240.939	238.8	230.082	240.867	239.125	251.735	274.535	270.346	285.216	245.027	238.591	249.734
2.1216		279.209	196.956	306.887	231.769	229.714	232.575	260.363	246.02	279.52	240.532	251.7	224.472	248.3	247.577	233.503	284.246	274.441	237.95	228.662	237.882	244.255	241.169	248.45	274.422	264.782	269.391	244.187	255.752	249.645
2.1879		290.307	206.515	291.761	229.879	234.05	226.511	258.181	248.096	278.868	246.048	253.145	224.869	254.4	245.393	240.323	298.094	275.22	235.893	232.034	238.16	244.176	241.607	248.999	268.882	261.533	261.918	243.003	258.377	250.269
2.2542		300.782	207.181	280.15	226.567	238.196	225.339	265.121	246.016	272.863	256.183	247.417	220.975	255.7	242.172	243.141	287.918	274.533	230.533	237.012	236.048	241.817	251.154	254.64	264.637	260.301	261.132	243.245	245.284	249.492
2.3205		297.171	204.497	276.304	220.989	236.441	227.185	275.963	242.336	264.631	251.493	241.935	219.712	259.8	243.726	243.419	281.173	268.532	238.802	235.123	236.509	243.766	255.372	255.731	260.476	264.339	268.141	239.902	235.978	248.447
2.3868		309.599	205.001	276.03	219.022	236.79	223.053	274.059	247.038	262.626	249.589	244.587	215.844	259.9	242.723	244.29	286.734	264.518	243.405	235.35	234.383	234.123	251.891	249.914	259.828	265.609	281.771	230.504	241.082	248.216
2.4531		305.366	189.716	274.803	221.379	237.211	219.685	264.975	251.478	260.74	247.529	242.197	210.392	246.5	235.258	240.186	294.59	260.524	242.915	234.863	236.275	232.096	251.371	245.158	264.718	268.622	278.462	227.92	253.714	246.492
2.5194		312.083	181.986	273.201	214.17	232.556	217.197	259.256	250.201	262.641	248.708	240.873	205.471	250.9	232.633	232.605	297.079	260.277	243.815	234.938	241.734	238.531	249.705	254.227	267.378	270.849	266.246	232.621	260.343	246.667
2.5857		314.73	179.774	257.336	202.012	230.527	225.687	258.247	248.326	262.914	255.48	242.18	205.609	260.9	233.578	229.861	293.488	264.791	242.405	240.56	246.354	239.257	252.118	269.455	267.632	273.148	275.52	231.851	263.655	248.181
2.652		328.183	185.207	253.542	201.639	232.856	237.345	257.412	254.55	266.472	261.821	242.259	216.54	253.4	234.191	231.93	293.382	267.677	241.325	244.844	263.397	244.602	259.54	280.254	269.478	280.884	281.333	232.28	251.44	251.411
2.7183		320.04	182.726	259.514	211.045	227.675	252.745	253.501	267.111	270.739	264.137	241.726	218.88	243.7	233.336	222.857	292.161	267.882	246.078	255.842	274.313	252.721	263.628	279.443	275.937	285.827	272.853	246.846	239.682	252.918
2.7846		319.078	186.219	261.588	219.51	212.218	268.4	254.383	270.295	271.49	264.962	243.051	212.013	243.6	240.127	208.904	287.75	269.426	252.953	270.759	271.002	248.623	265.47	280.115	286.482	285.552	273.022	263.932	250.015	254.953
2.8509		339.765	199.941	264.056	222.072	205.418	270.752	265.948	267.325	276.131	266.295	245.991	200.222	250.5	241.664	207.308	289.545	276.24	255.799	272.685	257.404	242.202	266.974	286.568	289.873	278.511	288.803	267.466	268.145	258.147
2.9172		332.7	198.062	263.064	219.3	208.474	266.488	279.69	274.802	280.768	257.006	248.156	202.108	251.4	241.971	211.946	287.781	286.772	253.855	259.557	242.966	246.244	264.616	284.94	288.254	270.38	293.748	262.794	274.823	258.109
2.9835		325.639	196.875	266.657	215.454	220.165	266.479	282.018	285.421	283.467	249.351	244.35	212.421	249	258.544	223.164	289.775	290.041	250.217	245.417	234.514	248.978	252.261	274.734	279.849	270.671	285.665	256.976	274.346	257.615
3.0498		335.004	197.919	265.627	222.259	225.162	266.837	282.69	289.124	280.032	255.988	239.212	223.24	250.1	277.407	224.097	287.542	287.615	249.082	232.816	238.418	240.658	249.461	274.908	273.638	271.035	276.093	257.09	262.398	258.108
3.1161		322.717	196.949	254.788	227.794	223.302	271.521	282.252	282.655	270.057	262.688	233.596	227.17	243.2	283.363	224.519	271.888	279.687	240.734	234.961	238.673	235.381	259.413	274.873	272.857	266.886	271.26	258.723	253.963	255.849
3.1824		305.81	198.584	262.07	235.207	228.535	275.002	281.923	278.182	268.315	266.345	232.524	234.934	251.3	285.212	230.141	270.68	274.535	238.747	237.806	244.895	235.908	264.017	283.649	270.638	264.667	282.632	253.691	259.506	257.861
3.2487		301.224	208.172	269.81	243.644	233.783	271.939	283.237	270.462	271.565	259.561	240.36	244.642	259.4	291.844	235.512	277.992	273.271	242.145	241.93	254.968	246.64	266.448	291.728	266.006	269.638	303.998	255.509	255.795	262.675
3.315		309.65	211.963	276.601	247.725	238.819	273.931	281.454	272.004	267.778	249.471	242.896	260.621	258.5	299.789	237.761	281.479	270.939	247.912	253.875	270.59	254.611	254.651	296.464	265.064	286.065	332.729	264.137	256.46	267.362
3.3813		310.83	212.988	280.215	253.998	233.345	266.086	275.179	281.84	264.508	250.206	250.594	279.575	253.9	307.01	231.46	280.709	266.205	263.725	266.069	292.335	254.487	248.866	303.146	275.73	295.691	344.922	259.794	251.285	270.291
3.4476		314.087	220.734	282.074	262.137	232.547	258.945	279.081	290.668	265.674	256.563	266.013	275.522	271.4	294.495	232.069	288.34	265.762	282.494	288.365	311.454	254.461	250.967	310.936	292.049	291.904	344.124	258.118	251.216	274.681
3.5139		341.916	233.986	280.281	277.07	230.872	264.557	271.464	299.487	279.404	262.821	279.541	271.04	292.6	272.942	230.778	292.7	277.234	285.862	306.287	327.553	261.385	258.345	314.914	291.797	295.902	335.379	267.451	263.698	280.592
3.5802		355.104	243.04	275.417	292.07	232.049	274.019	264.193	313.481	294.099	268.829	284.204	267.762	301.2	261.827	232.649	297.302	292.68	295.551	317.103	327.676	277.028	265.697	314.958	284.19	305.201	347.531	265.857	272.003	286.049
3.6465		346.129	248.167	267.695	299.329	236.845	283.971	264.566	329.791	294.626	285.116	279.039	267.221	300.9	250.532	233.461	298.994	290.97	318.363	323.897	323.063	296.55	275.309	321.108	286.991	325.388	365.018	268.804	276.244	290.662
3.7128		345.266	246.076	276.847	296.506	229	297.647	271.249	340.24	296.966	303.117	268.822	275.67	296.7	232.117	223.462	295.065	283.329	328.102	326.409	322.12	316.671	293.867	327.601	299.036	358.445	359.824	274.657	271.07	293.396
3.7791		348.902	249.558	274.396	283.879	226.223	316.772	286.56	352.618	306.112	313.478	260.505	274.695	275.8	199.022	225.15	292.308	284.883	332.99	326.548	337.016	325.701	308.523	324.974	328.235	378.641	354.14	276.975	266.097	294.434
3.8454		374.402	257.593	277.385	270.856	232.653	322.062	306.272	354.418	318.812	300.58	247.933	243.097	239.2	179.379	237.177	284.566	296.767	341.617	337.813	370.316	326.579	317.764	320.391	360.009	381.33	328.062	277.713	283.961	294.756
3.9117		385.007	262.8	296.749	267.939	244.179	305.598	318.589	362.061	348.664	267.178	235.864	196.214	211.6	164.598	248.405	277.732	326.034	353.559	369.833	382.873	335.417	293.412	304.385	370.045	377.708	274.376	296.533	304.803	299.363
3.978		373.165	265.418	319.937	271.09	252.687	303.702	329.51	355.503	374.607	231.702	225.349	151.539	188.5	149.3	251.709	259.201	355.452	345.001	391.281	353.421	347.249	258.929	276.209	364.452	378.31	237.217	310.81	326.001	294.545
4.0443		375.308	261.221	345.693	278.17	255.285	314.751	330.184	335.153	382.906	195.071	213.072	118.689	164.6	136.934	252.78	231.157	361.657	326.068	370.121	301.993	360.009	224.283	236.832	361.553	383.886	202.49	308.823	334.066	284.384
4.1106		354.254	242.435	372.389	287.313	258.09	316.408	341.846	301.615	379.816	163	188.819		143.3	128.013	254.64	205.549	352.343	306.021	320.372	244.492	374.63	184.971	198.501	363.639	391.882		286.884	310.246	279.672
4.1769		299.418	214.8	353.358	287.723	259.171	327.32	356.015	251.409	378.544	143.658	160.299			124.34	255.351	192.732	349.009	280.925	265.223	193.369	383.081	156.282	169.691	366.776	387.912		247.092	261.677	266.607
4.2432		234.88	195.316	339.837	273.341	263.77	351	359.493	210.295	383.595					123.863	263.014	184.674	347.53	263.234	214.527	154.495	351.417	140.181	155.873	371.615	353.057		205.183	213.282	258.847
4.3095		198.095	171.184	343.85	241.829	285.135	353.026	321.673	174.288	390.896					122.697	291.803	164.666	350	244.748	171.678		285.804	132.364		349.057	288.407		170.518	175.327	248.907
4.3758		169.112	144.412	353.164	205.63	313.021	329.563	263.868	154.428	395.549						313.588		349.5	221.962	141.303		220.442			306.973	224.68		150.931		250.478
4.4421		141.865	131.316	363.229	174.798	314.045	295.112	209.52	147.839	371.17						308.541		324.205	192.732	127.16		167.464			247.501	174.732		142.081		225.489
4.5084			130.668	336.249		299.203	237.541			313.328						290.621		283.134	165.557	125.748		124.147			194.045	146.584				220.569
			sty1∆
Cell width (μm)		1	2	3	4	5	6	7	8	9	10	11	12	13	14	15	16	17	18	19	20	21	22	23	24	25	26	27	28	29	30	31	Average
0		126.036	156.836	121.39	137.192	127.238	141.099	137.913	143.499	140.473	131.656	118.017	148.825	134.952	126.972	141.632	129.604	126.464	124.992	109.216	143.4	122.41	124.475	141.935	159.571	154.441	150.61	133.448	115.433	123.07	131.129	137.777	134.249
0.0663		136.747	185.342	130.142	155.359	124.803	159.37	155.215	164.704	164.456	139.799	119.95	178.835	137.842	133.621	181.796	138.982	136.301	129.599	125.967	152.664	118.358	130.849	155.114	192.45	170.897	158.09	137.932	107.63	122.965	154.463	159.835	147.099
0.1326		164.316	221.876	141.192	182.85	129.587	174.96	171.122	189.659	199.008	157.592	121.31	234.73	143.232	150.633	228.585	157.135	168.057	134.886	162.973	172.787	119.111	157.071	172.546	226.899	190.792	170.475	156.097	113.969	128.267	187.576	193.755	168.485
0.1989		206.645	271.58	157.001	209.91	146.208	192.759	187.231	206.899	234.641	190.368	126.711	290.301	147.592	182.956	265.517	192.684	219.973	153.362	223.126	205.91	121.645	189.196	183.5	270.375	222.328	189.324	186.852	132.679	148.212	217.265	227.669	196.788
0.2652		247.908	324.471	174.597	227.176	167.559	227.481	203.536	225.937	261.331	221.352	131.25	331.157	151.576	239.461	293.146	231.628	269.761	183.226	299.695	235.8	131.389	225.299	199.181	295.194	254.905	218.715	221.719	152.03	181.697	241.092	270.336	227.084
0.3315		282.243	339.918	195.095	239.444	197.996	270.119	216.742	234.252	271.669	241.325	143.32	331.689	169.556	295.951	297.756	241.453	294.033	211.773	363.116	262.06	151.041	263.627	227.456	308.885	271.335	241.124	233.666	170.923	211.979	264.893	294.619	249.647
0.3978		297.77	326.054	215.761	243.411	222.04	296.397	228.161	241.378	277.241	261.976	170.344	303.28	193.658	338.185	290.178	236.02	284.826	237.748	384.176	287.233	180.743	292.003	249.631	320.633	259.788	254.136	240.778	196.009	235.505	285.659	306.455	263.135
0.4641		280.749	308.297	223.942	233.386	227.422	307.003	227.275	234.642	279.819	260.771	203.489	297.28	207.243	337.954	296.01	234.461	271.054	249.829	380.342	284.787	227.168	294.114	267.399	307.742	247.152	264.402	249.053	216.123	256.804	284.43	317.329	267.015
0.5304		247.97	284.671	223.439	230.631	229.673	309.263	212.893	231.404	263.932	239.493	229.563	286.151	222.325	308.945	303.592	226.319	258.147	246.82	370.825	287.127	262.34	284.268	274.908	288.85	237.099	277.969	254.801	227.139	278.756	263.194	304.237	263.443
0.5967		228.64	271.473	216.472	232.457	229.315	315.348	204.283	231.053	251.3	223.23	247.66	277.773	243.246	305.081	312.225	222.959	259.748	236.141	375.263	287.832	273.593	268.824	260.658	277.213	213.877	288.247	259.337	238.924	283.343	237.95	284.936	259.948
0.663		220.663	267.746	203.593	232.495	222.446	333.93	200.768	233.089	241.147	237.661	253.272	268.499	257.235	293.167	311.427	215.965	276.458	226.665	371.874	270.582	264.306	259.4	257.379	268.465	190.72	294.613	255.391	232.28	264.793	218.033	275.274	255.462
0.7293		208.833	259.471	188.125	225.798	222.156	331.865	199.25	225.725	245.506	251.219	233.946	258.245	262.068	281.413	299.519	207.076	278.447	222.345	342.352	257.171	245.867	253.833	244.911	260.972	179.443	293.677	238.347	201.965	239.532	213.744	268.06	246.48
0.7956		205.946	256.06	180.066	215.548	223.811	309.895	197.564	221.854	262.021	252.636	218.996	248.565	264.779	270.122	292.998	209.379	265.302	218.194	319.759	242.066	228.28	248.146	237.145	256.894	180.69	269.263	222.445	193.042	219.121	214.827	261.04	238.918
0.8619		213.485	253.638	184.558	212.944	212.351	285.229	198.467	233.087	262.974	257.207	214.866	245.809	258.834	258.491	277.126	214.147	255.139	212.631	296.311	236.082	220.139	243.958	231.508	251.167	194.945	253.998	209.673	196.208	212.911	216.447	255.87	234.523
0.9282		212.157	243.666	187.539	215.493	214.992	257.679	207.989	244.425	256.489	251.837	209.61	240.69	246.335	252.871	262.713	217.739	253.37	208.41	273.105	238.227	222.917	230.417	217.938	242.101	198.425	248.011	210.371	200.014	214.308	221.852	251.329	230.743
0.9945		200.466	231.403	179.393	217.068	214.967	241.298	215.112	246.074	244.795	249.452	207.285	249.944	237.838	251.772	266.349	213.627	258.677	204.201	266.367	228.602	220.883	219.15	212.028	233.553	184.451	238.013	220.707	188.059	216.857	224.509	244.516	226.691
1.0608		193.457	225.84	166.273	223.481	204.476	235.526	210.406	242.075	239.772	243.006	207.679	251.616	239.759	243.18	262.4	206.369	253.413	196.134	270.81	219.758	211.343	217.565	215.172	229.502	191.529	231.015	220.951	180.606	220.742	220.167	236.26	222.912
1.1271		189.863	218.232	157.355	229.465	195.346	235.529	203.609	237.483	244.19	232.233	203.015	243.745	246.692	250.722	261.053	202.799	244.299	193.272	279.167	223.091	205.253	218.146	225.411	221.014	201.714	229.049	205.679	182.871	224.653	213.607	229.089	220.892
1.1934		186.254	215.157	158.453	225.053	195.353	232.865	200.251	228.863	251.775	224.864	198.808	232.784	235.714	249.286	269.654	199.368	231.784	193.843	272.421	228.855	208.643	216.061	229.748	214.166	191.42	229.511	207.784	173.575	220.72	211.848	219.146	217.872
1.2597		187.751	217.375	165.488	230.321	197.268	228.853	199.824	221.229	254.1	212.794	199.588	226.774	226.814	242.762	267.118	197.174	228.209	196.157	257.923	232.522	212.918	214.488	229.336	211.55	186.168	234.232	212.03	162.235	213.226	219.551	212.611	216.077
1.326		186.931	228.104	166.866	229.852	196.676	231.288	204.534	212.501	252.918	199.687	202.721	227.068	225.013	236.11	255.821	198.63	230.626	193.558	247.505	222.743	215.73	210.382	231.061	207.393	192.732	234.227	207.679	167.986	212.035	228.146	210.628	215.069
1.3923		192.082	239.861	178.225	223.529	195.118	227.12	205.022	221.891	250.667	192.433	203.984	229.823	225.395	232.283	248.192	201.459	229.399	187.759	244.787	207.451	219.231	209.89	221.34	207.982	204.419	237.867	219.975	175.053	218.59	230.563	207.099	215.758
1.4586		199.001	238.393	188.951	223.664	198.279	228.402	203.721	227.91	249.412	197.253	206.54	225.994	224.251	234.959	240	203.268	220.887	188.804	249.371	210.574	221.93	213.941	214.811	209.172	195.977	234.094	216.566	172.593	226.527	223.205	207.984	216.014
1.5249		194.885	232.619	187.359	214.394	197.425	234.726	205.206	225.015	252.473	210.934	209.691	221.808	225.777	237.823	232.419	203.918	215.033	184.825	252.745	213.415	216.459	215.209	209.15	213.995	188.859	234.244	203.933	173.761	229.446	213.635	210.212	214.884
1.5912		192.726	234.541	186.341	205.272	199.31	237.774	204.756	215.194	258.898	219.75	213.931	225.807	226.393	236.91	236.352	197.899	223.973	185.101	249.951	210.313	214.483	213.374	212.189	214.659	195.809	238.137	197.049	183.908	223.628	211.506	215.75	215.538
1.6575		190.408	238.1	181.841	212.05	207.556	237.348	202.632	205.386	262.929	212.391	214.103	234.207	223.275	230.289	243.634	191.509	230.546	187.749	246.441	204.331	216.881	209.539	209.934	211.387	208.17	237.851	203.769	190.082	214.024	208.009	214.536	215.513
1.7238		187.012	232.867	181.834	216.712	213.32	239.849	199.246	208.067	252.78	199.852	211.005	231.726	220.159	230.184	254.391	191.19	230.808	193.687	243.605	205.547	212.86	206.906	206.456	217.47	201.064	237.725	217.474	181.522	212.024	202.876	210.605	214.543
1.7901		188.588	231.084	181.259	212.238	209.604	242.963	200.63	216.75	246.135	204.37	211.549	223.471	216.479	237.23	259.866	187.912	226.301	200.031	242.053	209.292	212.047	209.616	205.858	228.038	192.81	234.607	214.44	174.927	209.874	202.802	218.67	214.564
1.8564		187.237	234.048	179.696	208.382	204.045	245.303	201.836	217.659	256.84	213.751	214.658	221.122	210.142	238.604	258.827	186.411	228.568	195.023	241.395	213.742	208.753	214.932	212.835	233.588	189.284	238.12	199.791	178.264	205.437	205.505	230.973	215.315
1.9227		184.086	232.685	180.955	207.135	208.623	242.195	202.126	212.88	254.069	212.576	216.203	226.149	211.513	233.937	262.212	187.317	227.965	195.55	246.532	212.673	218.908	214.044	218.522	238.579	191.878	245.018	197.897	181.401	204.145	213.71	235.641	216.681
1.989		183.917	232.24	184.465	209.012	223.129	236.745	197.819	212.274	241.968	214.338	212.163	232.066	220.513	227.025	266.146	189.467	227.66	208.159	248.281	213.963	215.046	210.794	215.956	232.511	199.905	245.891	204.306	181.712	205.407	219.586	240.417	217.835
2.0553		176.783	235.118	185.339	215.382	230.144	225.025	190.812	204.639	242.775	214.873	212.308	241.316	227.893	231.376	266.074	192.958	230.247	215.56	243.948	215.737	203.138	215.404	216.036	227.4	199.686	235.858	211.137	186.661	212.087	219.064	232.623	217.981
2.1216		172.564	233.919	188.965	228.386	232.555	221.394	189.288	198.001	238.38	213.46	211.342	241.354	229.429	238.557	265.408	192.544	232.517	219.083	234.286	222.274	198.168	225.946	213.862	226.945	195.731	217.647	207.978	192.058	219.192	215.555	228.28	217.583
2.1879		170.775	230.506	184.422	234.258	232.837	219.475	188.749	196.523	231.73	210.479	213.293	233.456	219.913	247.731	272.966	197.314	227.213	221.967	227.056	227.431	194.314	221.559	210.21	224.238	196.101	215	210.357	189.779	219.995	215.923	229.217	216.606
2.2542		167.229	227.837	175.314	231.514	227.86	221.135	188.143	200.957	226.29	210.543	217.092	231.711	220.458	250.478	271.613	199.122	219.959	223.856	227.325	222.114	195.936	211.165	213.926	227.162	209.476	218.898	212.494	184.392	216.389	217.31	227.226	215.965
2.3205		165.076	228.678	170.627	233.95	215.911	227.706	191.889	209.943	225.563	207.549	218.694	224.557	231.415	241.053	254.798	199.081	222.944	226.815	233.568	217.025	192.154	214.639	222.591	228.928	205.606	224.354	216.646	184.064	215.508	213.339	228.629	215.913
2.3868		168.959	233.322	165.761	236.309	211.172	225.785	201.449	213.453	226.261	209.361	218.606	226.129	237.374	239.041	240.741	200.052	227.39	221.634	243.748	225.649	188.133	220.146	222.019	231.399	202.997	234.733	211.931	184.264	217.774	209.683	229.46	216.927
2.4531		171.718	236.399	163.177	235.395	211.144	218.352	208.088	212.581	225.062	217.786	218.861	223.177	237.745	234.538	235.291	195.992	228.911	216.229	248.259	223.982	196.991	225.824	216.775	235.582	215.626	241.483	202.003	179.16	214.237	206.189	232.833	217.077
2.5194		175.883	232.66	166.482	233.04	221.789	216.837	206.062	210.742	226.885	223.708	222.655	224.464	236.743	237.933	237.531	197.953	228.833	210.456	250.789	217.372	207.792	228.927	222.428	234.648	209.832	245.052	205.875	177.6	210.033	201.05	238.225	218.073
2.5857		179.672	225.484	169.351	232.097	230.68	221.264	213.357	221.047	229.819	226.091	226.844	229.444	237.258	231.072	243.957	210.586	225.579	211.144	258.863	210.258	215.436	223.359	223.612	234.057	203.645	244.71	207.488	177.393	207.008	198.875	237.088	219.566
2.652		181.083	220.584	166.033	233.79	228.154	227.865	217.941	232.692	224.168	221.399	235.867	231.008	236.693	228.447	242.461	217.828	222.06	211.162	271.219	203.416	217.619	206.871	224.5	232.829	204.675	245.22	213.982	174.564	202.018	204.769	234.095	219.839
2.7183		186.852	215.571	164.77	233.831	226.438	232.955	211.56	231.25	219.371	214.341	231.542	237.416	226.089	236.223	245.405	214.266	228.829	219.956	281.958	206.722	219.829	203.891	220.302	235.364	201.483	252.235	217.041	175.687	199.109	212.176	231.65	220.455
2.7846		185.585	216.601	169.631	230.698	221.885	239.936	209.696	239.625	222.103	210.216	229.624	236.41	212.977	234.1	252.592	214.658	234.638	226.898	284.475	212.587	214.386	205.663	219.141	237.475	190.766	260.356	217.798	181.018	204.246	210.696	234.234	221.313
2.8509		181.995	214.847	171.556	226.557	221.757	243.682	210.487	245.441	228.819	207.947	232.203	235.763	216.474	233.992	255.406	214.969	232.124	223.634	274.884	213.146	209.245	208.234	219.288	228.083	181.387	265.869	215.62	176.759	211.601	202.666	237.265	220.7
2.9172		182.832	216.785	171.841	229.022	213.74	241.425	209.812	252.039	227.228	210.963	226.734	232.769	219.221	232.49	255.029	214.38	235.999	216.671	272.833	211.815	214.589	211.07	214.016	221.891	176.638	266.122	210.25	173.632	212.283	201.482	229.822	219.53
2.9835		179.174	227.555	173.388	240.586	205.511	240.874	199.444	259.795	223.905	218.24	217.886	230.913	221.851	231.632	256.595	217.763	238.192	210.522	274.582	213.995	217.143	210.696	207.283	226.87	171.663	256.93	213.433	178.017	203.892	206.546	222.162	219.259
3.0498		175.862	235.825	173.553	247.498	202.247	244.275	195.191	255.397	226.53	230.097	214.148	227.048	226.237	228.098	255.443	216.855	240.602	216.994	274.62	217.836	212.322	212.112	206.32	237.908	176.345	248.107	206.709	171.538	201.068	211.37	224.403	219.76
3.1161		182.294	235.442	175.108	248.9	199.154	249.47	195.708	238.673	225.613	247.186	217.784	228.648	231.002	226.65	260.854	211.863	249.565	235.91	276.421	231.188	207.957	216.495	211.701	245.38	183.726	251.067	202.343	170.808	205.337	211.506	236.418	222.909
3.1824		184.931	236.427	176.307	256.835	202.186	250.988	204.14	238.737	221.503	259.019	219.322	236.712	234.589	224.822	274.007	202.983	251.673	240.78	281.377	233.38	209.06	212.31	224.604	248.597	198.975	256.545	207.721	183.312	210.861	213.792	245.064	227.147
3.2487		183.052	236.539	168.563	258.823	206.771	247.022	209.8	237.912	218.038	263.273	206.913	234.068	236.389	227.083	289.86	200.178	254.315	238.033	276.468	240.722	218.89	203.305	230.11	253.271	212.781	257.269	226.092	193.168	211.557	218.404	248.676	229.269
3.315		187.14	241.188	161.674	245.412	206.053	253.055	206.249	242.117	221.669	256.107	203.591	242.045	241.877	237.468	303.496	205.241	266.326	218.983	273.326	258.848	223.973	204.862	234.344	257.949	214.448	258.723	245.045	195.897	212.811	219.821	252.374	232.004
3.3813		195.451	241.112	165.569	240.732	211.268	268.2	207.323	238.532	227.394	240.313	209.166	251.2	255.127	235.777	294.071	210.135	288.253	216.029	275.591	275.735	219.639	208.471	239.435	248.442	217.007	262.394	253.408	196.542	217.595	226.078	253.877	235.157
3.4476		200.625	233.842	171.864	244.358	213.348	280.072	207.708	235.557	220.406	225.283	210.398	257.072	266.782	241.777	291.549	209.106	296.652	220.551	278.372	268.111	221.434	212.479	246.817	254.486	222.048	263.781	259.081	204.291	219.171	231.921	243.121	237.163
3.5139		199.751	232.242	173.749	249.031	207.192	289.825	210.027	238.142	216.682	223.489	208.747	256.318	278.136	253.182	289.598	204.835	297.269	233.798	282.953	268.384	228.916	217.287	253.677	277.303	241.008	267.678	257.129	213.907	224.725	236.759	248.884	241.31
3.5802		195.362	234.988	172.786	260.762	201.381	296.806	217.421	231.168	228.322	219.878	203.265	252.593	290.08	257.393	284.249	200.969	291.559	252.665	291.538	283.263	229.578	218.791	252.029	303.976	249.67	265.733	238.436	212.59	231.602	248.498	272.751	244.842
3.6465		195.822	239.341	165.82	258.646	206.297	295.097	211.633	225.158	240.059	211.398	200.331	237.522	298.388	263.74	280.622	205.572	278.931	258.572	304.567	284.378	232.245	219.033	244.657	317.016	233.382	248.114	213.231	219.902	234.955	254.714	301.055	244.523
3.7128		203.053	248.578	158.101	246.614	216.556	294.459	207.257	220.755	250.318	212.379	209.276	235.498	308.801	271.959	274.689	219.309	288.247	257.53	314.868	253.468	240.49	217.312	226.551	311.073	235.398	233.388	189.125	230.887	247.04	253.191	314.645	244.865
3.7791		211.54	258.638	155.721	244.459	218.134	291.625	209.112	222.87	264.606	213.379	214.413	249.888	316.744	259.2	260.501	224.116	308.759	240.988	314.586	227.245	257.547	217.185	199.721	273.809	226.073	221.039	162.596	234.875	254.251	229.967	306.599	241.619
3.8454		219.864	274.747	157.867	253.875	220.219	278.637	216.198	218.521	282.495	202.906	212.206	269.732	314.947	253.823	236.26	232.646	307.162	228.997	312.537	203.896	272.254	222.001	175.763	228.009	200.701	200.168	151.141	252.917	254.526	197.401	271.174	236.245
3.9117		223.021	290.064	162.752	253.582	220.983	258.76	220.875	192.422	289.988	181.768	210.404	272.609	284.857	261.645	207.664	245.205	268.608	205.57	314.285	180.085	280.523	245.678	155.03	189.296	173.777	173.32	143.79	263.444	235.7	166.078	226.359	225.746
3.978		228.067	279.317	169.809	249.917	221.688	244.081	217.443	172.784	276.047	158.47	205.554	243.239	235.914	275.836	183.575	239.088	230.029	176.404	331.828	163.391	279.601	270.96	141.535	165.537		155.669		232.306	203.224	146.31	186.58	216.697
4.0443		234.689	232.726	175.778	248.107	216.934	228.642	195.073	159.878	246.632	142.061	204.921	217.277	194.681	277.267	163.96	214.602	205.362	164.413	352.72	151.24	278.609	265.655	131.007	151.132				192.526	170.649	130.014	162.461	203.893
4.1106		232.446	171.976	181.479	260.587	200.655	208.38	170.042		205.35	133.159	209.169	180.618	162.117	249.552	144.891	183.966	174.335	156.394	337.081	138.462	277.496	245.183	125.112	142.96				164.078	149.284	122.512	148.405	187.988
4.1769		230.15	134.012	181.416	264.6	182.273	180.848	154.614		166.17	127.846	224.676	154.426	135.398	221.047	135.489	160.065	146.806	146.226	291.072		255.078	217.89	119.938					140.719	132.784		139.769	176.805
4.2432		236.575	117.364	179.068	247.046	159.103	156.287	144.216		141.827	123.074	241.724	137.298	119.962	179.346		146.999	136.664	149.038	239.613		222.133	201.52						127.819			135.57	168.678
4.3095		243.542		178.526	230.669		140.893	133.307		128.992	120.314	251.974	126.106		151.456		138.63	132.389	143.572	193.588		184.445	184.916						124.15				165.145
4.3758		257.59		179.735	214.362			127.64				256.711			136.647		128.929			155.725		149.82	162.772										176.993
4.4421		259.242		185.19	195.315							238.9			127.043					135.555		132.595	138.552										176.549
4.5084		246.817		188.925	178.186							206.564			127.872							126.103	121.611										170.868

## Sheet: Figure 5E
							Figure 5E
											Relative for3+ level *
									Experiment 1		Experiment 2		Experiment 3		Mean	Std. Deviation
							Wild type (untreated )		1		0.919		0.876		0.9317	0.06296
							Wild type (0,2 μM LatA)		0.7459		0.8334		0.934		0.8378	0.09413
							Wild type (0,5 μM LatA)		1.3034		1.4179		1.259		1.327	0.08199
							Wild type (1 μM LatA)		1.5537		1.6627		1.382		1.533	0.1415
							Wild type (2 μM LatA)		4.2908		4.3562		4.875		4.507	0.3201
							Wild type (5 μM LatA)		5.1192		4.8904		5.034		5.015	0.1156
							* Relative gene expression was quantified based on 2−ΔΔCT method and normalized using leu1+ mRNA expression in each sample.

## Sheet: Figure 5F
							Figure 5F
											Relative For3 level *
									Experiment 1		Experiment 2		Mean	Std. Deviation
							wis1DD (untreated )		0.62597		0.531527		0.5787	0.06678
							pyp1∆(untreated )		0.392598		0.330923		0.3618	0.04361
							Wild type (untreated )		1.12		1		1.06	0.08485
							Wild type (0,2 μM LatA)		0.799791		0.643806		0.7218	0.1103
							Wild type (0,5 μM LatA)		0.592863		0.734993		0.6639	0.1005
							Wild type (1 μM LatA)		0.698593		0.506537		0.6026	0.1358
							Wild type (2 μM LatA)		0.537226		0.400734		0.469	0.09651
							Wild type (5 μM LatA)		0.353974		0.410367		0.3822	0.03988
							* Estimated by determining the signal ratio of the correspondent anti-GFP (total For3) blot with respect to the anti-cdc2 blot (internal control)

## Sheet: Figure 5G
						Figure 5G
											Relative For3 level *
									Experiment 1		Experiment 2		Mean	Std. Deviation
						Wild type (0,2 μM LatA, 0 min )			1		1.07016		1.035	0.04961
						Wild type (0,2 μM LatA, 30 min )			0.781142		0.691037		0.7361	0.06371
						Wild type (0,2 μM LatA, 60 min )			0.700467		0.765401		0.7329	0.04592
						Wild type (0,2 μM LatA, 90 min )			0.5259		0.655737		0.5908	0.09181
						Wild type (0,2 μM LatA, 120 min )			0.587595		0.66288		0.6252	0.05324
						* Estimated by determining the signal ratio of the correspondent anti-GFP (total For3) blot with respect to the anti-cdc2 blot (internal control)
