# Supplementary material for: Stress-activated MAPK signaling controls fission yeast actomyosin ring integrity by modulating formin For3 levels
Source: eLife. 2020 Sep 11;9:e57951. doi: 10.7554/eLife.57951 (PMC7511234; doi:10.7554/eLife.57951)
Supplement: Figure 6—source data 1. [file elife-57951-fig6-data1.xlsx]

## Sheet: Figure 6B
					Figure 6B
									Relative For3 level *
					YES, 34ºC, 4h		Experiment 1		Experiment 2		Mean	Std. Deviation
					Wild type		1		1.10838		1.054	0.07664
					sty1∆		2.02561		1.53978		1.783	0.3435
					cdc3-124		0.433548		0.523205		0.4784	0.0634
					cdc3-124 sty1∆		1.31364		1.0843		1.199	0.1622
									Relative For3 level *
					YES, 34ºC, 4h		Experiment 1		Experiment 2		Mean	Std. Deviation
					Wild type		1		1.09086		1.045	0.06425
					sty1∆		2.02505		1.64983		1.837	0.2653
					cdc8-110		0.34234		0.383096		0.3627	0.02882
					cdc8-110 sty1∆		1.34629		1.65325		1.5	0.2171
					* Estimated by determining the signal ratio of the correspondent anti-GFP (total For3) blot with respect to the anti-cdc2 blot (internal control)
