# Supplementary material for: Stress-activated MAPK signaling controls fission yeast actomyosin ring integrity by modulating formin For3 levels
Source: eLife. 2020 Sep 11;9:e57951. doi: 10.7554/eLife.57951 (PMC7511234; doi:10.7554/eLife.57951)
Supplement: Figure 7—source data 1. [file elife-57951-fig7-data1.xlsx]

## Sheet: Figure 7A
			Figure 7A
									Relative For3 level *
			YES, 28ºC				Experiment 1		Experiment 2		Mean	Std. Deviation
			For3-HA (WT)				1		1.1165		1.058	0.08238
			for3∆ Z3EV:For3-HA + 10mM β-estradiol (0h)				0		0		0	0
			for3∆ Z3EV:For3-HA + 10mM β-estradiol (3h)				1.24733		1.64743		1.447	0.2829
			for3∆ Z3EV:For3-HA + 10mM β-estradiol (6h)				4.15146		3.753		3.952	0.2818
			* Estimated by determining the signal ratio of the correspondent anti-HA (total For3) blot with respect to the anti-cdc2 blot (internal control)

## Sheet: Figure 7B
			Figure 7B
													% Cells with defective CAR*
										Experiment 1		Experiment 2		Experiment 3		Mean	Std. Deviation
			for3∆ Z3EV:For3-HA (-) β-estradiol + 0.15 μM LatA (0 min)							0		0		0		0	0
			for3∆ Z3EV:For3-HA (-) β-estradiol + 0.15 μM LatA (20 min)							26.0714		27.5738		30.25		27.97	2.117
			for3∆ Z3EV:For3-HA (-) β-estradiol + 0.15 μM LatA (40 min)							80.3704		78.3784		83.825		80.86	2.756
			for3∆ Z3EV:For3-HA (-) β-estradiol + 0.15 μM LatA (60 min)							92.7324		88.4015		89.547		90.23	2.244
			for3∆ Z3EV:For3-HA (-) β-estradiol + 0.15 μM LatA (80 min)							95.8716		90.404		92.185		92.82	2.789
			for3∆ Z3EV:For3-HA 10mM β-estradiol (3h) + 0.15 μM LatA (0 min)							0		0		0		0	0
			for3∆ Z3EV:For3-HA 10mM β-estradiol (3h) + 0.15 μM LatA (20 min)							20.1482		21.4286		18.376		19.98	1.533
			for3∆ Z3EV:For3-HA 10mM β-estradiol (3h) + 0.15 μM LatA (40 min)							66.2722		76.9912		71.086		71.45	5.369
			for3∆ Z3EV:For3-HA 10mM β-estradiol (3h) + 0.15 μM LatA (60 min)							92.4731		91.3793		90.237		91.36	1.118
			for3∆ Z3EV:For3-HA 10mM β-estradiol (3h) + 0.15 μM LatA (80 min)							96.0674		90.3226		92.954		93.11	2.876
			for3∆ Z3EV:For3-HA 10mM β-estradiol (6h) + 0.15 μM LatA (0 min)							0		0		0		0	0
			for3∆ Z3EV:For3-HA 10mM β-estradiol (6h) + 0.15 μM LatA (20 min)							6.77966		6.87023		9.1		7.583	1.314
			for3∆ Z3EV:For3-HA 10mM β-estradiol (6h) + 0.15 μM LatA (40 min)							32.8947		26.3804		27.291		28.86	3.528
			for3∆ Z3EV:For3-HA 10mM β-estradiol (6h) + 0.15 μM LatA (60 min)							50.7692		42.6752		46.185		46.54	4.059
			for3∆ Z3EV:For3-HA 10mM β-estradiol (6h) + 0.15 μM LatA (80 min)							69.2308		57.0552		63.908		63.4	6.104
			for3∆ Z3EV:For3-HA 10mM β-estradiol (6h), washout (12h)+ 0.15 μM LatA (0 min)							0		0		0		0	0
			for3∆ Z3EV:For3-HA 10mM β-estradiol (6h), washout (12h)+ 0.15 μM LatA (20 min)							25.5102		30.7405		25.649		27.3	2.98
			for3∆ Z3EV:For3-HA 10mM β-estradiol (6h), washout (12h)+ 0.15 μM LatA (40 min)							88.8		79.5238		83.111		83.81	4.678
			for3∆ Z3EV:For3-HA 10mM β-estradiol (6h), washout (12h)+ 0.15 μM LatA (60 min)							95.2703		88.492		90.276		91.35	3.514
			for3∆ Z3EV:For3-HA 10mM β-estradiol (6h), washout (12h)+ 0.15 μM LatA (80 min)							96.875		92.2473		97.184		95.44	2.765
			* number of cells per sample > 200
