# Supplementary material for: Stress-activated MAPK signaling controls fission yeast actomyosin ring integrity by modulating formin For3 levels
Source: eLife. 2020 Sep 11;9:e57951. doi: 10.7554/eLife.57951 (PMC7511234; doi:10.7554/eLife.57951)
Supplement: Figure 8—source data 1. [file elife-57951-fig8-data1.xlsx]

## Sheet: Figure 8B
				Figure 8B
									Relative Sty1 activation units *
					1h LatA (μM):	0	0.0025	0.005	0.01	0.02	0.05	0.1	0.2
				Experiment 1		0.86	1.43117	1.59773	1.85761	2.09613	2.19873	2.27637	2.29298
				Experiment 2		1	1.61267	1.64217	2.23606	2.53	2.72137	2.55205	2.51609
				Mean		0.93	1.522	1.62	2.047	2.313	2.46	2.414	2.405
				Std. Deviation		0.09899	0.1283	0.03142	0.2676	0.3068	0.3696	0.1949	0.1578
				* Relative Units for Sty1 activation were estimated by determining the signal ratio of the anti-phospho-p38 blots with respect to the anti-cdc2 blot (internal control)

## Sheet: Figure 8C
		Figure 8C
								% Cells with defective CAR*
						Experiment 1		Experiment 2		Experiment 3		Mean	Std. Deviation
		S. japonicus Wild type (0.005 μM LatA)				47,61 (10/21)		41,66 (5/12)		57,14 (8/14)		48.8	7.809
		S. japonicus sty1∆ (0.005 μM LatA)				91,66 (22/24)		93,75 (15/16)		86,66 (13/15)		90.69	3.643
		* Total number of cells > 47
